# Supplementary material for: Chemoselective synthesis of diaryl disulfides via a visible light-mediated coupling of arenediazonium tetrafluoroborates and CS2
Source: PubMed Central journal article supplement (PMC5480343; doi:10.3762/bjoc.13.91), 2017-05-15

**Supporting Information**  
**for**  
**Chemoselective synthesis of diaryl disulfides via a visible**  
**light-mediated coupling of arenediazonium tetrafluoroborates**  
**and CS<sub>2</sub>**

Jing Leng, Shi-Meng Wang and Hua-Li Qin\*

Address: School of Chemistry, Chemical Engineering and Life Science, Wuhan University of Technology, 205 Luoshi Road, Wuhan 430070, PR China

Email: Hua-Li Qin\*- qinhuali@whut.edu.cn

\*Corresponding author

**Experimental procedures, characterization data and copies of <sup>1</sup>H and**  
**<sup>13</sup>C NMR spectra for final compounds**

**Table of contents**

1. General
2. General procedure for the synthesis of arenediazonium tetrafluoroborates
3. General procedure for the preparation of compounds **3a–p**
4. NMR spectra

## 1. General

All reactions were carried out in oven or flame-dried glassware under air atmosphere. Unless otherwise noted, solvents and reagents were used as purchased without further purification. The reactions were magnetically stirred and monitored by thin layer chromatography. Yields refer to chromatographically and spectroscopically pure compounds.  $^1\text{H}$  and  $^{13}\text{C}$  NMR spectra were recorded in  $\text{CDCl}_3$  at 500 MHz ( $^1\text{H}$  NMR) and 126 MHz ( $^{13}\text{C}$  NMR) on a Bruker Avance 500 spectrometer. Chemical shifts are reported in parts per million relative to TMS using the residual solvent signal as internal standard ( $\text{CDCl}_3$ , 7.26 and 77.2 ppm) and coupling constants are given in hertz (Hz). Data are reported as follows: chemical shift, multiplicity (s = singlet, d = doublet, t = triplet, q = quartet, m = multiplet, br = broad), coupling constant.

## 2. General procedure for the synthesis of arenediazonium tetrafluoroborates<sup>1</sup>

In a 250 mL round-bottomed flask, aniline (20.0 mmol) was dissolved in acetone (5 mL) and cooled to  $-20\text{ }^\circ\text{C}$ . A 50% aqueous solution of  $\text{HBF}_4$  (20 mL) was added. The mixture was kept at  $-20\text{ }^\circ\text{C}$  with a bath of 70% water in methanol and dry ice before a solution of  $\text{NaNO}_2$  (2.75 g, 40 mmol, dissolved in 5 mL  $\text{H}_2\text{O}$ ) was added drop-wise. The reaction mixture was stirred at  $0\text{ }^\circ\text{C}$  (ice-water bath) for additional 20 min before cooled again to  $-20\text{ }^\circ\text{C}$  for the arenediazonium tetrafluoroborate to precipitate (in some case, the salts precipitated at lower temperature). The crude diazonium salt was collected by filtration, washed successively with a small amount of ice water, methanol, and diethyl ether before dried in vacuo (3–10 mbar) for 30 min. Pure arenediazonium tetrafluoroborates were obtained by recrystallization from acetone.

### 3. General procedure for the preparation of compounds 3a-p

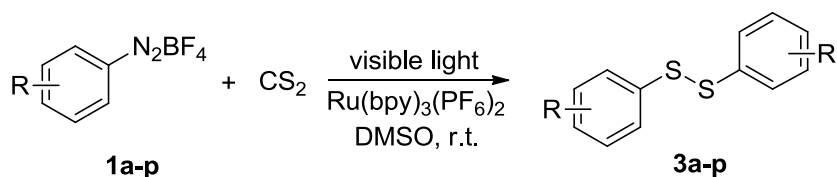

To a flask charged with the corresponding arenediazonium tetrafluoroborate (0.5 mmol) and carbon disulfide (1 mmol, 76 mg), DMSO (5 mL) and the photocatalyst Ru(bpy)<sub>3</sub>(PF<sub>6</sub>)<sub>2</sub> (1 mol %) were added at room temperature. The mixture was placed in the irradiation apparatus equipped with a 20 W blue light-emitting diode (LED) strip and the reaction progress was followed by TLC. After complete conversion of the starting material (approximately 5–6 h), the reaction mixture was extracted with EtOAc (3 × 15 mL). The combined organic phase was washed with H<sub>2</sub>O (3 × 30 mL) to completely remove DMSO, dried (MgSO<sub>4</sub>) and concentrated in vacuo. The products were purified by column chromatography on silica gel using petroleum ether or a mixture of petroleum ether and ethyl acetate as eluents.

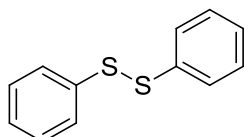

#### *1,2-Diphenyldisulfane (3a)*<sup>2</sup>

80%; white solid. <sup>1</sup>H NMR (500 MHz, CDCl<sub>3</sub>): δ 7.50 (d, *J* = 8.0 Hz, 4H), 7.30 (t, *J* = 7.5 Hz, 4H), 7.23 (t, *J* = 7.5 Hz, 2H); <sup>13</sup>C NMR (126 MHz, CDCl<sub>3</sub>): δ 137.2, 129.2, 127.7, 127.3 .

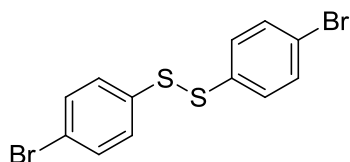

#### *1,2-Bis(4-bromophenyl)disulfane (3b)*<sup>2</sup>

81%; white solid. <sup>1</sup>H NMR (500 M, CDCl<sub>3</sub>): δ 7.43 (d, *J* = 8.6 Hz, 4H), 7.34 (d, *J* = 8.6 Hz, 4H); <sup>13</sup>C NMR (126 MHz, CDCl<sub>3</sub>): δ 135.9, 132.4, 129.6, 121.7.

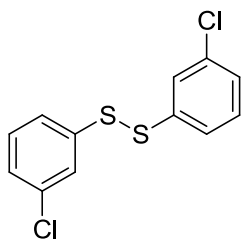

*1,2-Bis(3-chlorophenyl)disulfane (3c)*<sup>3</sup>

85%; white solid. <sup>1</sup>H NMR (500 MHz, CDCl<sub>3</sub>): δ 7.48 (s, 2H), 7.36 (dt, *J*<sub>1</sub> = 7.4 Hz, *J*<sub>2</sub> = 1.8 Hz, 2H), 7.26-7.20 (m, 4H); <sup>13</sup>C NMR (126 MHz, CDCl<sub>3</sub>): δ 138.5, 135.3, 130.3, 127.7, 127.1, 125.5.

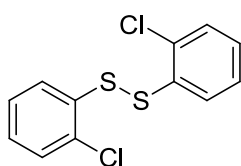

*1,2-Bis(2-chlorophenyl)disulfane (3d)*<sup>4</sup>

94%; white solid. <sup>1</sup>H NMR (500 MHz, CDCl<sub>3</sub>): δ 7.56 (dd, *J*<sub>1</sub> = 7.9 Hz, *J*<sub>2</sub> = 1.5 Hz, 2H), 7.37 (dd, *J*<sub>1</sub> = 7.8 Hz, *J*<sub>2</sub> = 1.3 Hz, 2H), 7.22 (td, *J*<sub>1</sub> = 7.7 Hz, *J*<sub>2</sub> = 1.2 Hz, 2H), 7.16 (td, *J*<sub>1</sub> = 7.6 Hz, *J*<sub>2</sub> = 1.6 Hz, 2H); <sup>13</sup>C NMR (126 MHz, CDCl<sub>3</sub>): δ 134.6, 132.0, 129.9, 128.0, 127.7, 127.4.

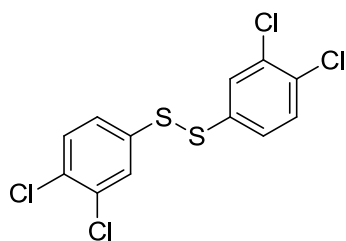

*1,2-Bis(3,4-dichlorophenyl)disulfane (3e)*<sup>5</sup>

90%; white solid. <sup>1</sup>H NMR (500 MHz, CDCl<sub>3</sub>): δ 7.56 (d, *J* = 2.0 Hz, 2H), 7.38 (d, *J* = 8.4 Hz, 2H), 7.29 (dd, *J*<sub>1</sub> = 8.4 Hz, *J*<sub>2</sub> = 2.0 Hz, 2H); <sup>13</sup>C NMR (126 MHz, CDCl<sub>3</sub>): δ 136.4, 133.7, 132.2, 131.2, 129.4, 127.1.

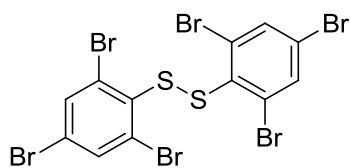

*1,2-Bis(2,4,6-tribromophenyl)disulfane (3f)*<sup>6</sup>

88%; white solid. <sup>1</sup>H NMR (500 MHz, CDCl<sub>3</sub>): δ 7.74 (s, 4H); <sup>13</sup>C NMR (126 MHz, CDCl<sub>3</sub>): δ 136.6, 135.4; 132.3; 125.0.

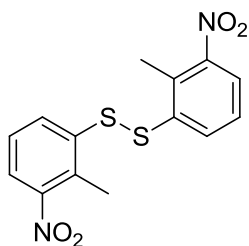

*1,2-Bis(2-methyl-3-nitrophenyl)disulfane (3g)*<sup>7</sup>

88%; white solid. <sup>1</sup>H NMR (500 MHz, CDCl<sub>3</sub>): δ 7.71 (dd,  $J_1 = 9.5$  Hz,  $J_2 = 1.9$  Hz, 4H), 7.29 (t,  $J = 8.0$  Hz, 2H), 2.59 (s, 6H); <sup>13</sup>C NMR (126 MHz, CDCl<sub>3</sub>): δ 151.4, 138.3, 132.1, 131.5, 127.2, 123.5, 16.2.

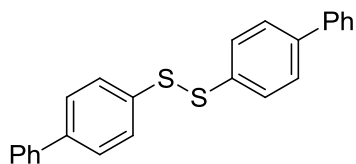

*1,2-Di([1,1'-biphenyl]-4-yl)disulfane (3h)*<sup>8</sup>

76%; white solid. <sup>1</sup>H NMR (500 MHz, CDCl<sub>3</sub>): δ 7.62 (d,  $J = 8.5$  Hz, 4H), 7.57 (t,  $J = 7.5$  Hz, 8H), 7.45 (t,  $J = 7.6$  Hz, 4H), 7.36 (t,  $J = 7.4$  Hz, 2H); <sup>13</sup>C NMR (126 MHz, CDCl<sub>3</sub>): δ 140.5, 140.3, 136.2, 129.0, 128.4, 127.9, 127.7, 127.1.

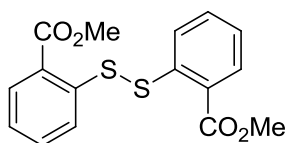

*Dimethyl 2,2'-disulfanediyl dibenzoate (3i)*<sup>9</sup>

94%; white solid. <sup>1</sup>H NMR (500 MHz, CDCl<sub>3</sub>): δ 8.06 (d,  $J = 7.8$  Hz, 2H), 7.75 (d,  $J =$

8.2 Hz, 2H),  $\delta$  7.40 (t,  $J = 7.7$  Hz, 2H),  $\delta$  7.23 (t,  $J = 7.0$  Hz, 2H), 3.98 (s, 6H);  $^{13}\text{C}$  NMR (126 MHz,  $\text{CDCl}_3$ ):  $\delta$  167.0, 140.5, 133.2, 131.6, 127.4, 126.0, 125.6, 52.5.

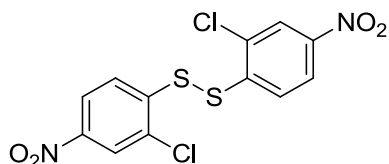

*1,2-Bis(2-chloro-4-nitrophenyl)disulfane (3j)*<sup>10</sup>

99%; white solid.  $^1\text{H}$  NMR (500 MHz,  $\text{CDCl}_3$ ):  $\delta$  8.29 (d,  $J = 2.3$  Hz, 2H), 8.10 (dd,  $J_1 = 8.8$  Hz,  $J_2 = 2.3$  Hz, 2H), 7.64 (d,  $J = 8.8$  Hz, 2H);  $^{13}\text{C}$  NMR (126 MHz,  $\text{CDCl}_3$ ):  $\delta$  147.2, 142.1, 132.2, 126.6, 125.2, 122.7.

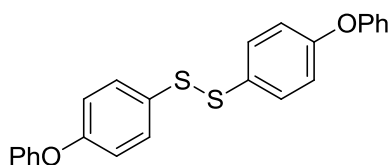

*1,2-Bis(4-phenoxyphenyl)disulfane (3k)*<sup>11</sup>

70%; yellow liquid.  $^1\text{H}$  NMR (500 MHz,  $\text{CDCl}_3$ ):  $\delta$  7.47 (d,  $J = 8.8$  Hz, 4H), 7.36 (t,  $J = 8.3$  Hz, 4H), 7.15 (t,  $J = 7.9$  Hz, 2H), 7.03 (d,  $J = 8.7$  Hz, 4H), 6.95 (d,  $J = 8.8$  Hz, 4H);  $^{13}\text{C}$  NMR (126 MHz,  $\text{CDCl}_3$ ):  $\delta$  157.7, 156.6, 133.3, 131.4, 129.9, 123.9, 119.4, 119.1.

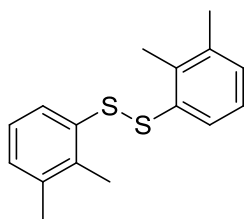

*1,2-Bis(2,3-dimethylphenyl)disulfane (3l)*<sup>12</sup>

76%; white solid.  $^1\text{H}$  NMR (500 MHz,  $\text{CDCl}_3$ ):  $\delta$  7.41 (d,  $J = 7.0$  Hz, 2H), 7.03 (m, 4H), 2.37 (s, 6H), 2.30 (s, 6H);  $^{13}\text{C}$  NMR (126 MHz,  $\text{CDCl}_3$ ):  $\delta$  137.5, 135.9, 135.8, 129.0, 126.8, 126.1, 20.4, 16.3.

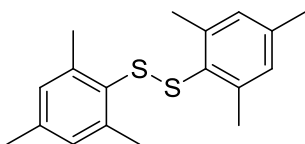

*1,2-Dimesityldisulfane (3m)*<sup>13</sup>

56%; white solid. <sup>1</sup>H NMR (500 MHz, CDCl<sub>3</sub>): δ 6.84 (s, 4H), 2.26 (s, 6H), 2.21 (s, 12H);  
<sup>13</sup>C NMR (126 MHz, CDCl<sub>3</sub>): δ 143.4, 139.4, 131.7, 129.0, 21.5, 21.2.

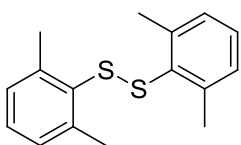

*1,2-Bis(2,6-dimethylphenyl)disulfane (3n)*<sup>14</sup>

42%; white solid. <sup>1</sup>H NMR (500 MHz, CDCl<sub>3</sub>): δ 7.11 (t, *J* = 7.5 Hz, 2H), 7.02 (d, *J* = 7.5 Hz, 4H), 2.25 (s, 12H); <sup>13</sup>C NMR (126 MHz, CDCl<sub>3</sub>): δ 143.6, 134.9, 129.4, 128.2, 21.6.

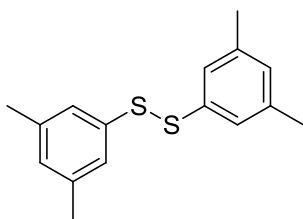

*1,2-Bis(3,5-dimethylphenyl)disulfane (3o)*<sup>15</sup>

56%; white solid. <sup>1</sup>H NMR (500 MHz, CDCl<sub>3</sub>): δ 7.13(s, 4H), 6.86 (s, 2H), 2.29 (s, 12H);  
<sup>13</sup>C NMR (126 MHz, CDCl<sub>3</sub>): δ 138.9, 137.0, 129.2, 125.3, 21.4.

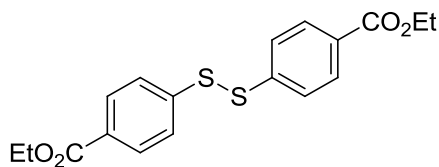

*Diethyl 4,4'-disulfanediyldibenzoate (3p)*<sup>16</sup>

92%; white solid. <sup>1</sup>H NMR (500 MHz, CDCl<sub>3</sub>): δ 7.97 (d, *J* = 8.7 Hz, 2H), 7.52 (d, *J* = 8.6 Hz, 2H), 4.35 (q, *J* = 7.1 Hz, 2H), 1.37 (t, *J* = 7.1 Hz, 3H); <sup>13</sup>C NMR (126 MHz, CDCl<sub>3</sub>): δ 166.0, 142.1, 130.3, 129.3, 126.1, 61.2, 14.4.

## References

- (1) Qin, H.-L.; Zheng, Q.; Bare, G. A. L.; Wu, P.; Sharpless, K. B. *Angew. Chem. Int. Ed.* **2016**, *55*, 14155-14158.
- (2) Banfield, S. C.; Omori, A. T.; Leisch, H.; Hudlicky, T.; *J. Org. Chem.* **2007**, *72*, 4989-4992.
- (3) Vandavasi, J. K.; Hu, W.-P.; Chen, C.-Y.; Wang, J.-J.; *Tetrahedron*, **2011**, *67*, 8895-8901.
- (4) Zhao, J.-W.; Song, T.; Jiang, H.-L.; Xu, L.-Z.; Zhu, S.-Z.; *Chin. J. Chem.* **2010**, *28*, 1623-1629.
- (5) Khan, K. M.; Taha, M.; Rahim, F.; Ali, M.; Jamil, W.; Perveen, S.; Choudhary, M. I.; *Lett. Org. Chem.* **2010**, *7*, 415-419.
- (6) Hunter, W. H.; Kohlhase, H.; *J. Am. Chem. Soc.* **1932**, *54*, 2425-2432.
- (7) Srisook, E.; Chi, D. Y.; *Bull. Korean Chem. Soc.* **2004**, *25*, 895-899.
- (8) Soleiman-Beigi, M.; Arzehgar, Z.; *Monatsh Chem.* **2016**, doi: 10.1007/s00706-016-1673-2
- (9) Misra, A. K.; Agnihotri, G.; *Synthetic Commun.* **2004**, *34*, 1079-1085.
- (10) Riegel, B.; Lappin, G. R.; Adelson, B. H.; Jackson, R. I.; Albisetti, C. J.; Dodson, J. R. M.; Baker, R. H.; *J. Am. Chem. Soc.* **1946**, *68*, 1264-1266.
- (11) Suter, C. M.; *J. Am. Chem. Soc.* **1931**, *53*, 1112-1116.
- (12) Bhar, D.; Chandrasekaran, S.; *Synthesis*, **1994**, *8*, 785-786.
- (13) Suzuki, H.; Shinoda, M.; *B. Chem. Soc. Jpn.* **1977**, *50*, 321-322.
- (14) Ruano, J. L. G.; Parra, A.; Aleman, J. *Green Chem.* **2008**, *10*, 706-711.
- (15) Spurg, A.; Schnakenburg, G.; Waldvogel, S. R.; *Chem. Eur. J.* **2009**, *15*, 13313-13317.
- (16) Meier, H.; Konnerth, U.; Graw, S.; Echter, T.; *Chem. Ber.* **1984**, *117*, 107-126.



## 4. NMR spectra

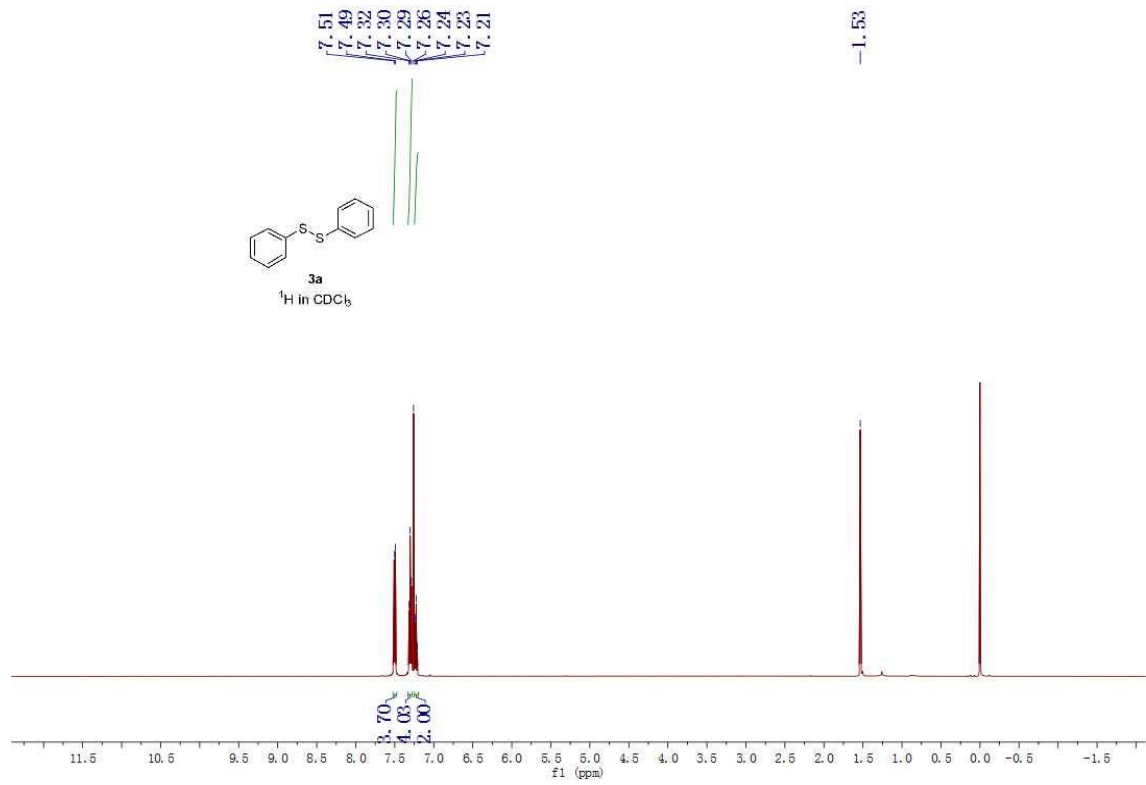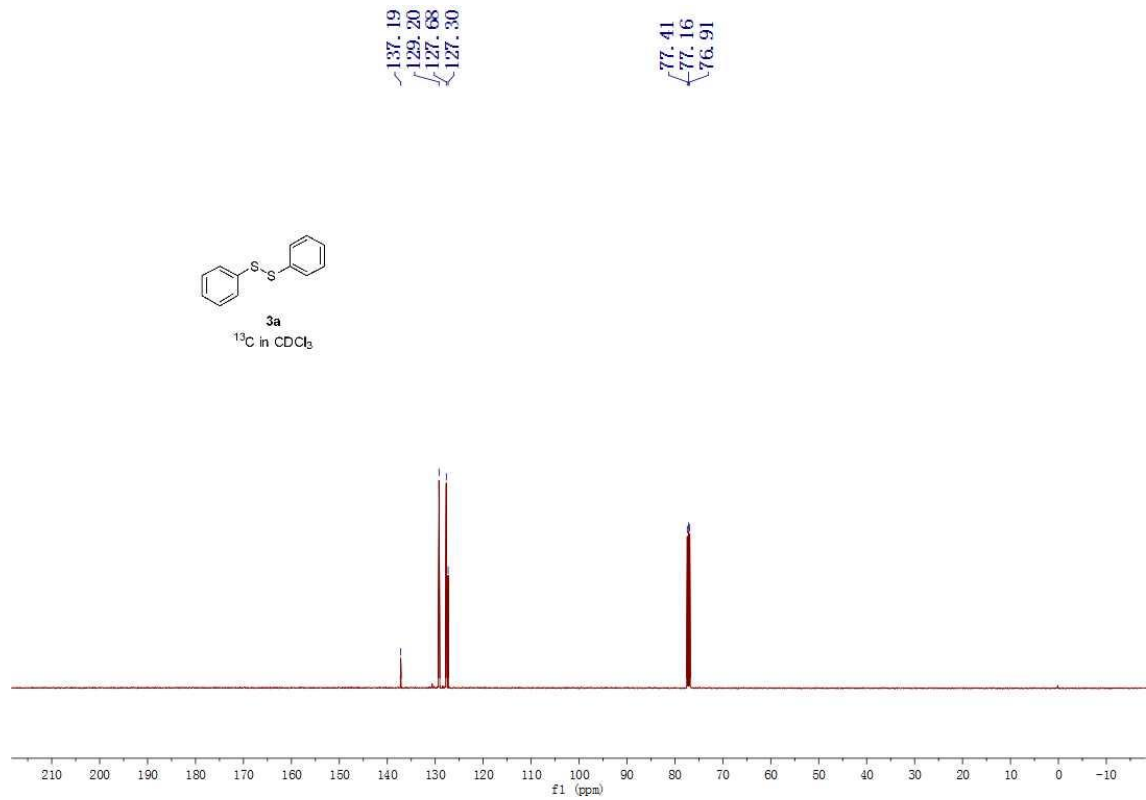

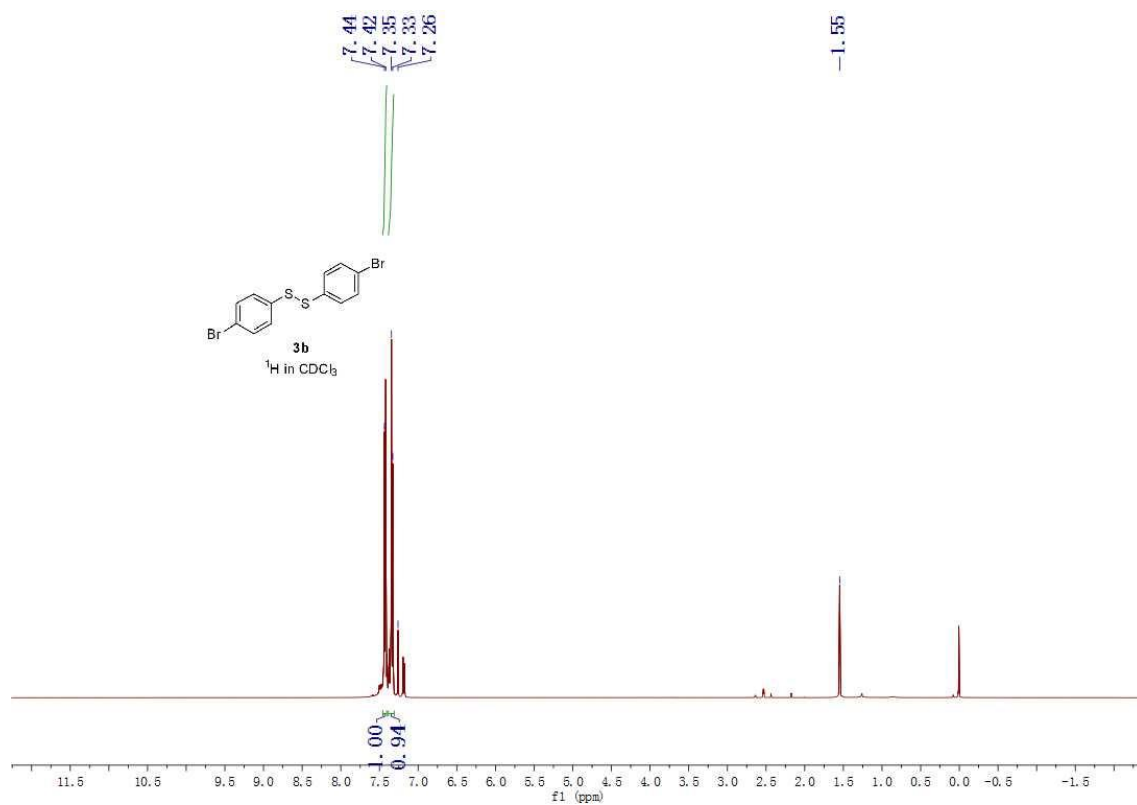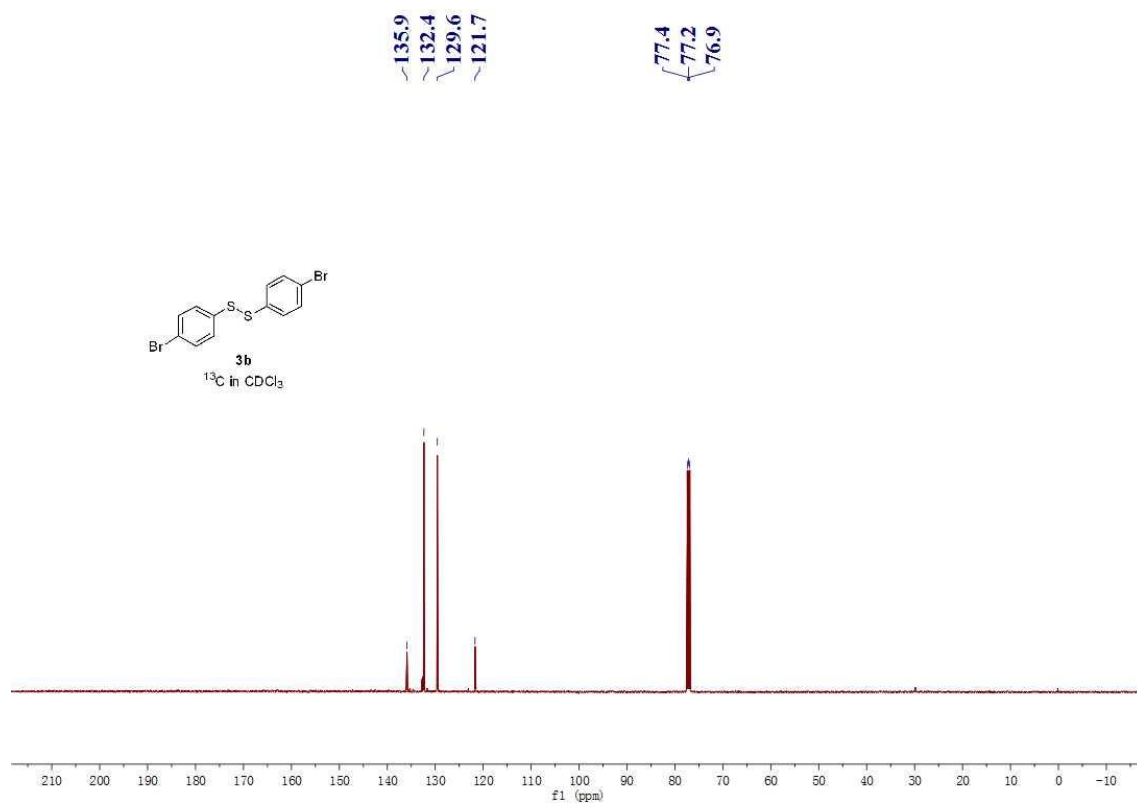

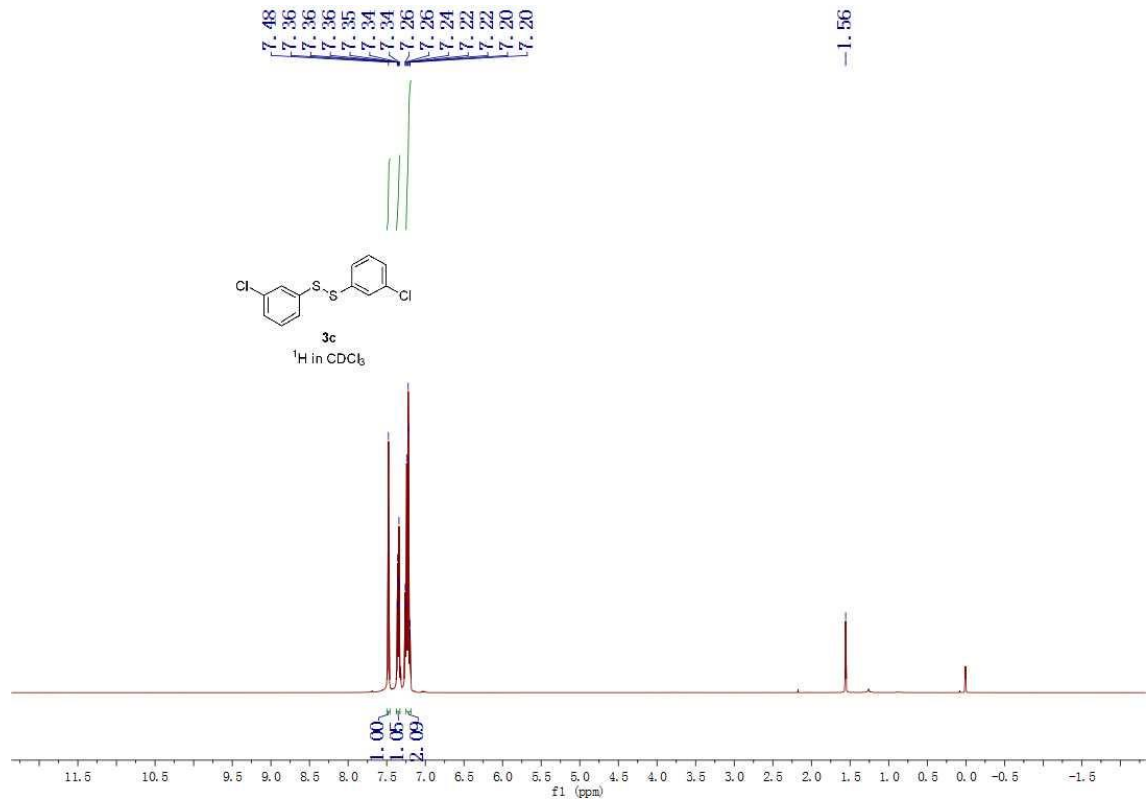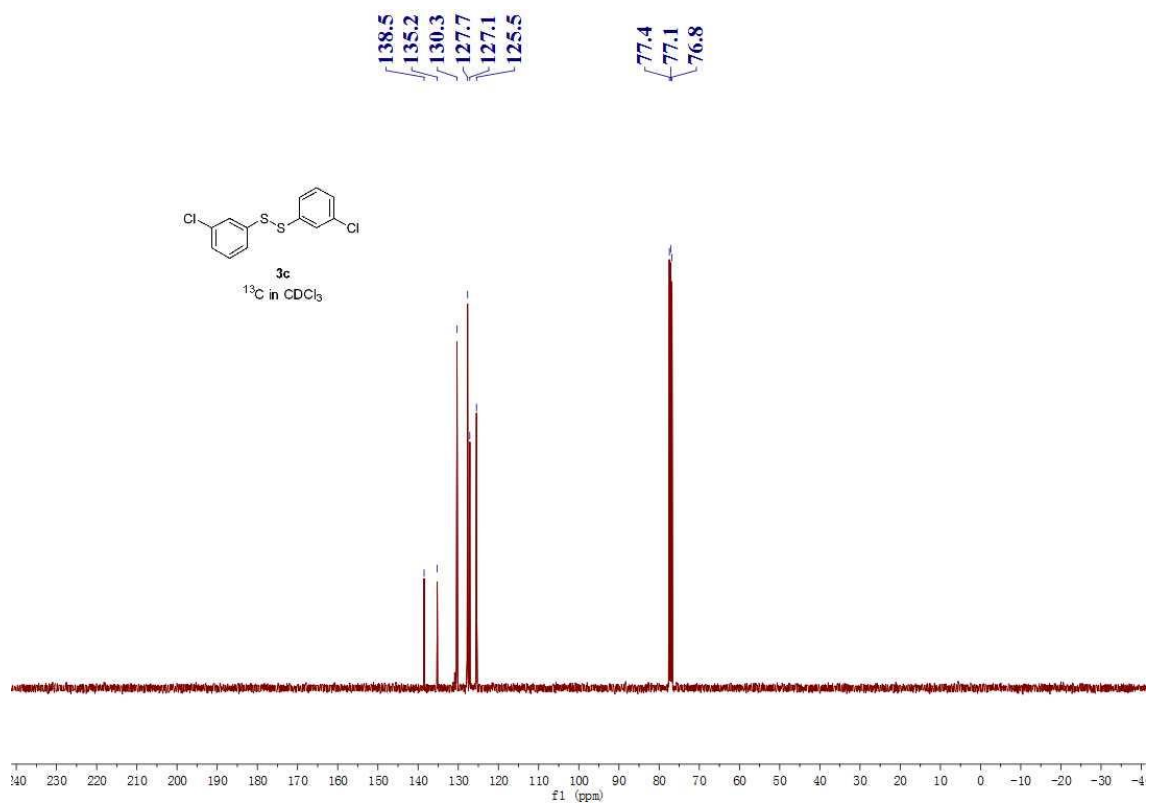

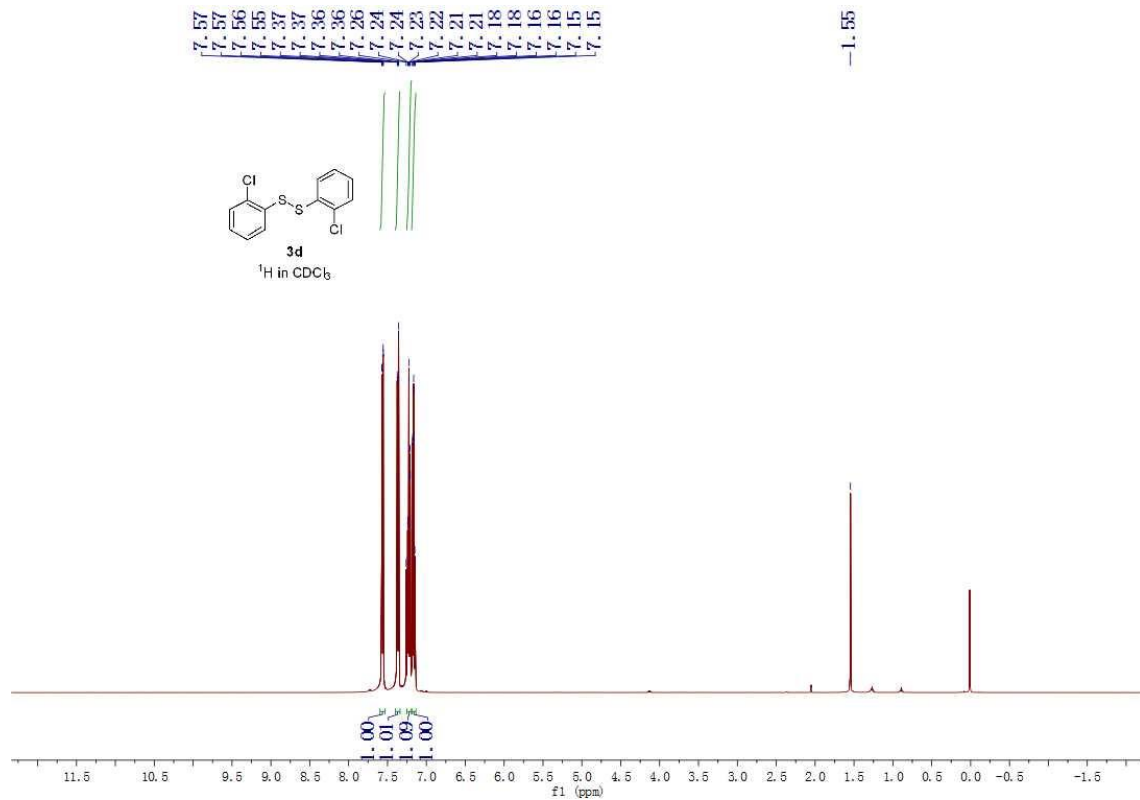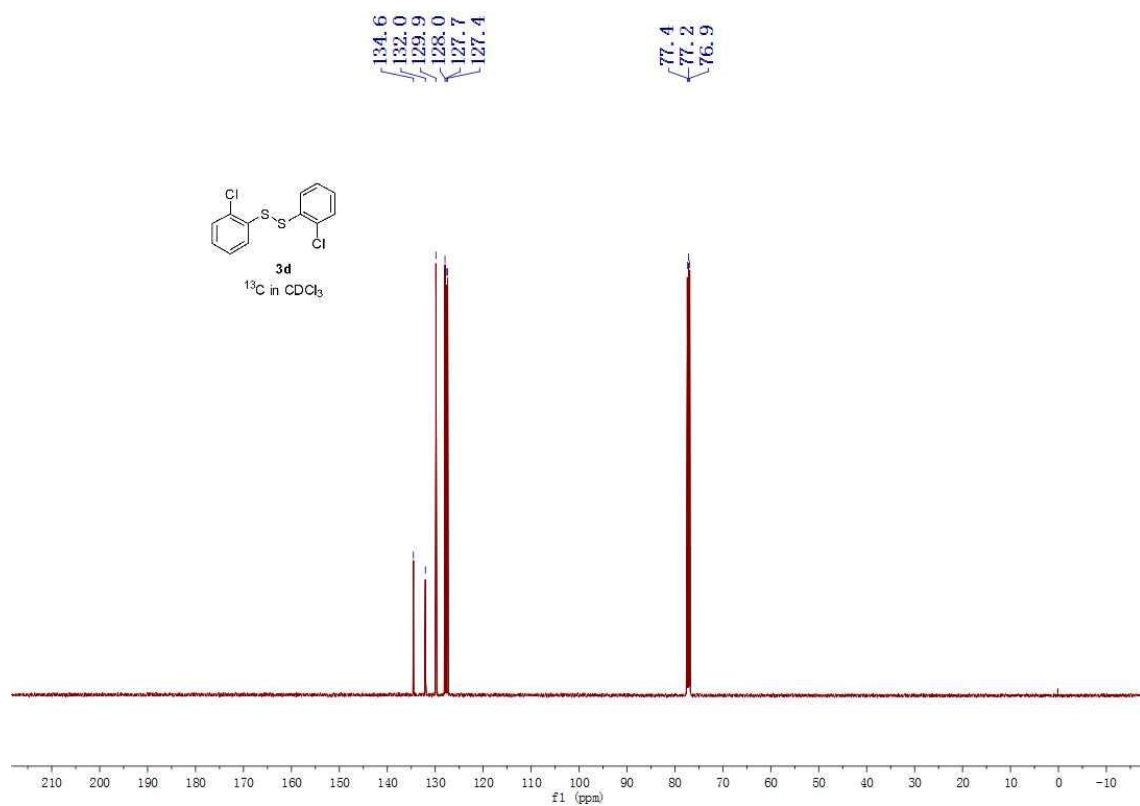

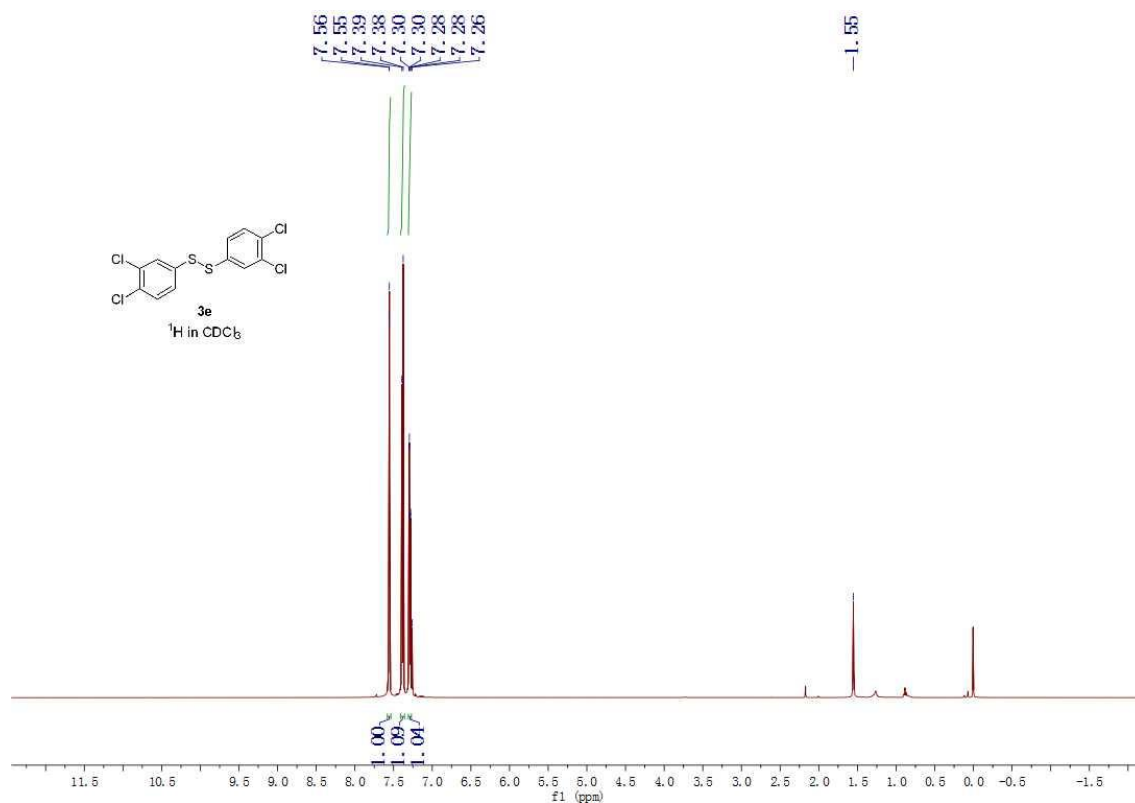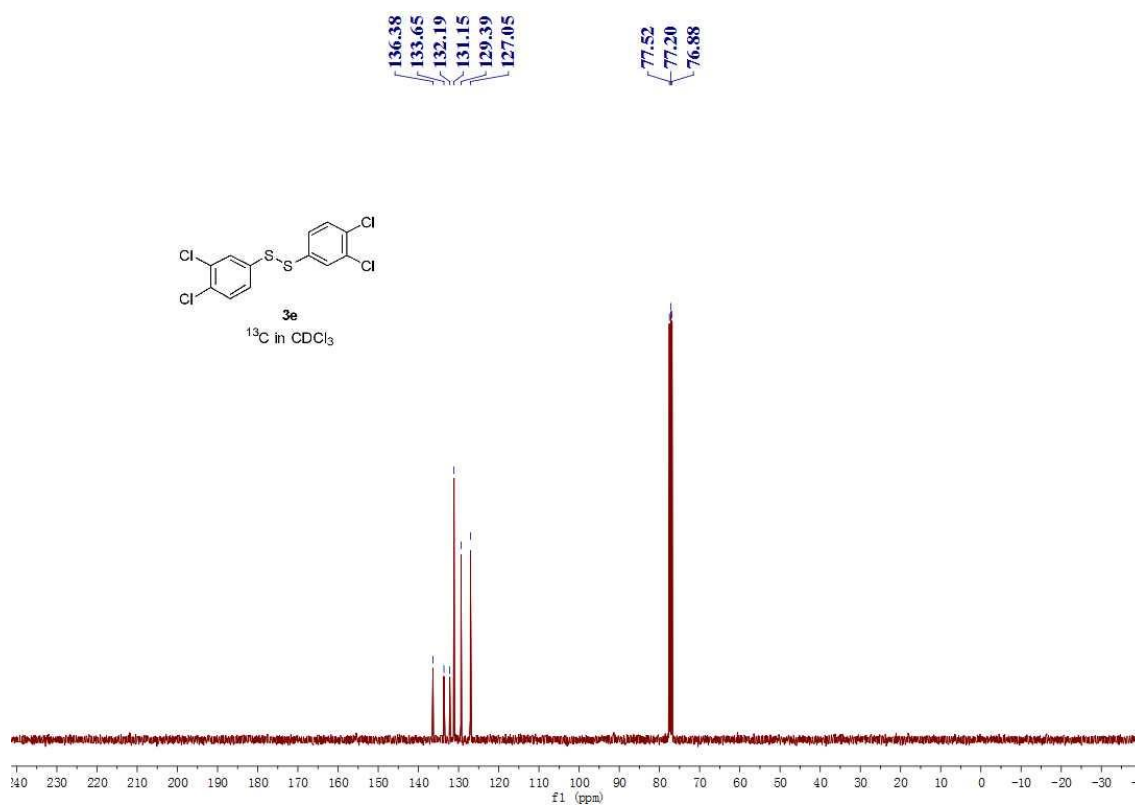

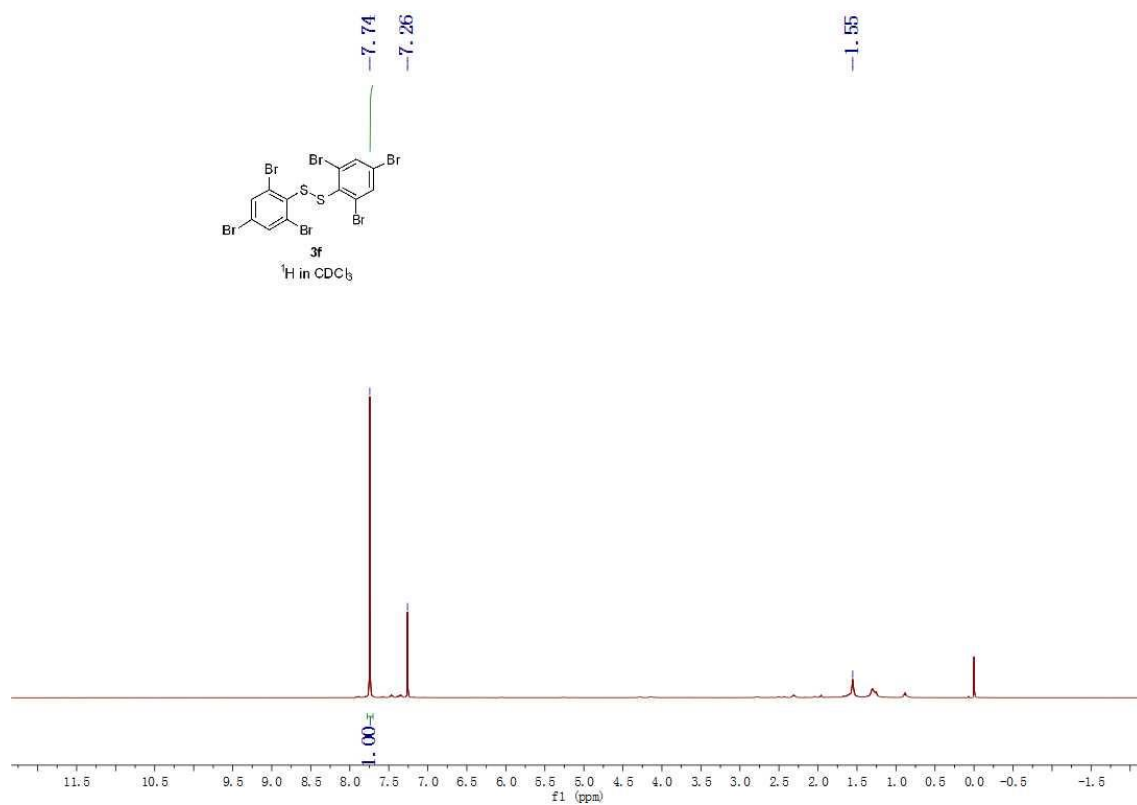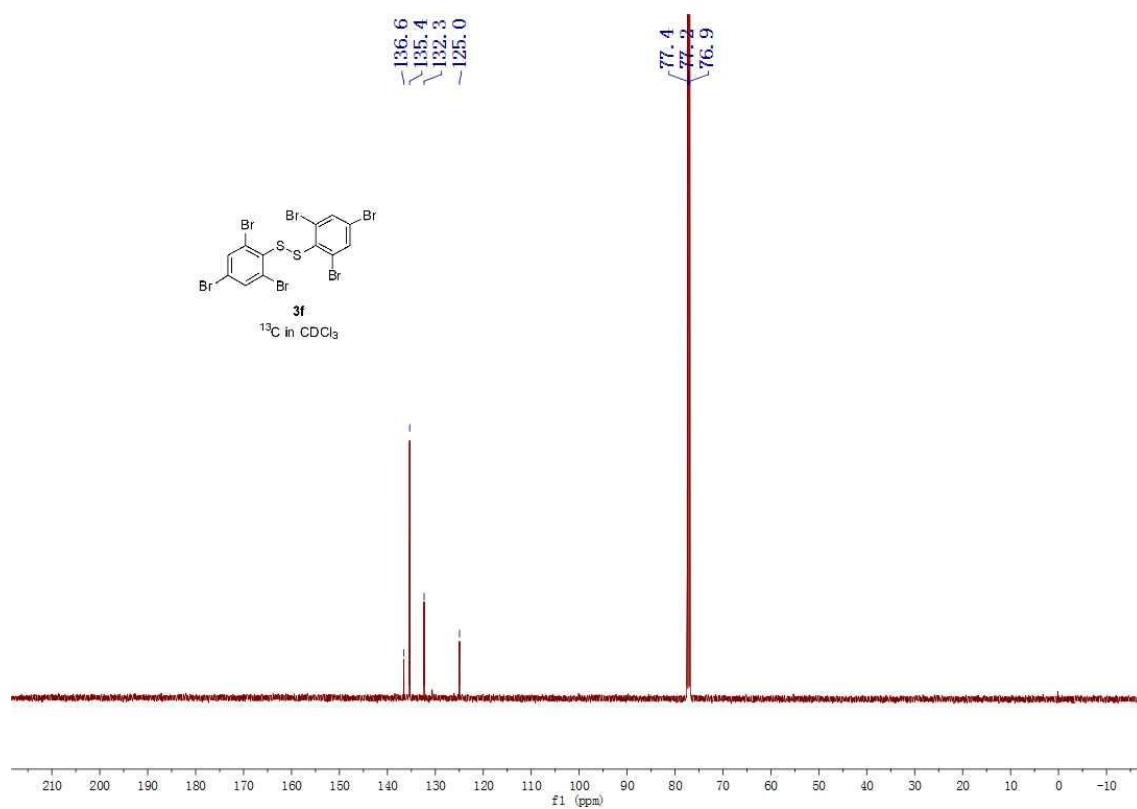

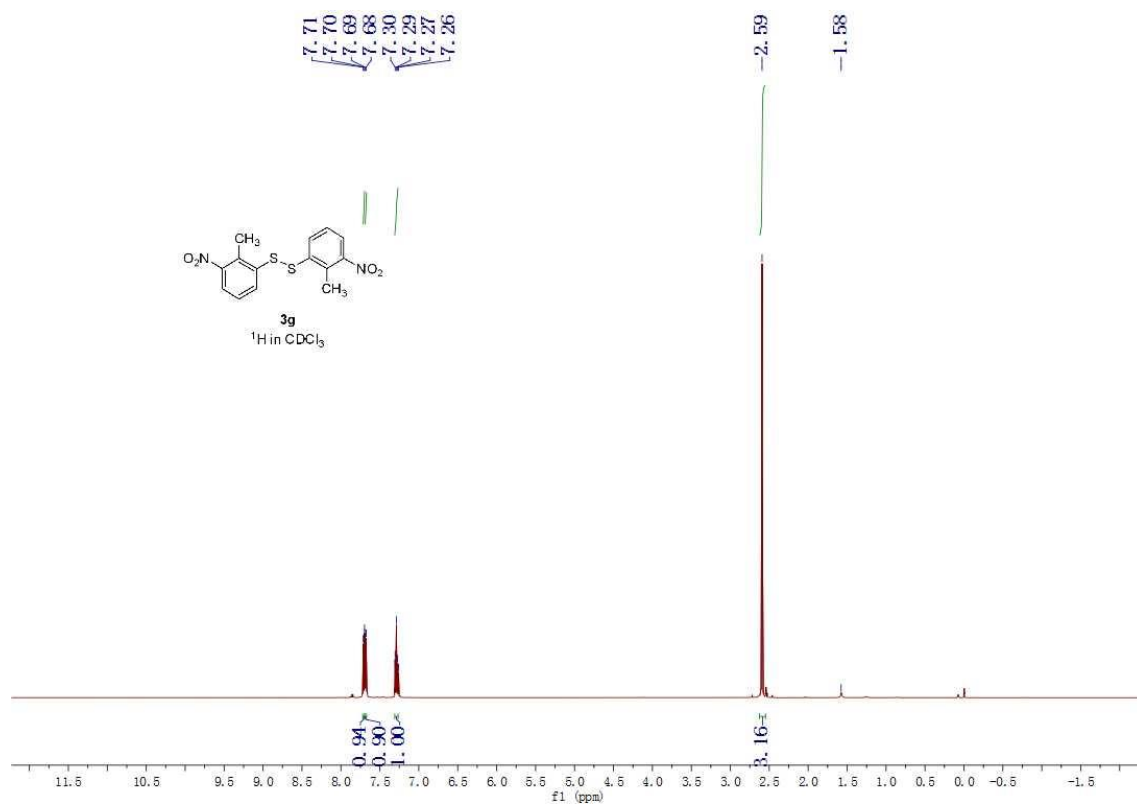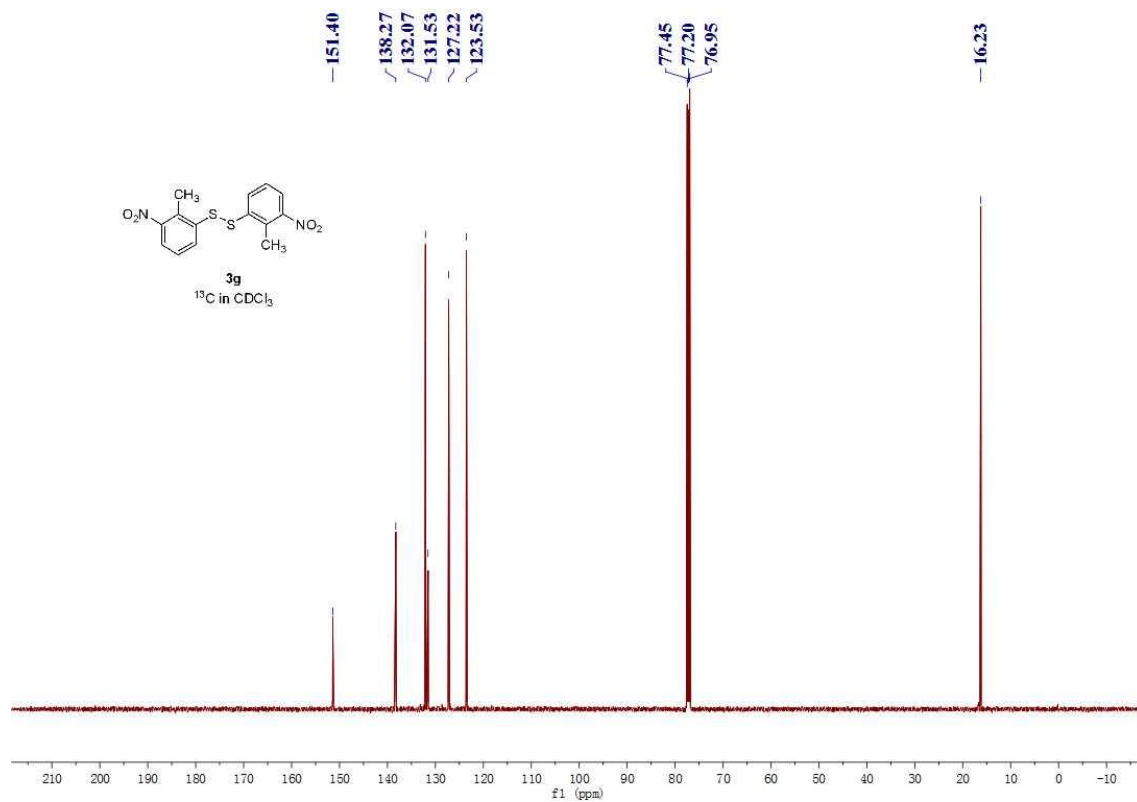

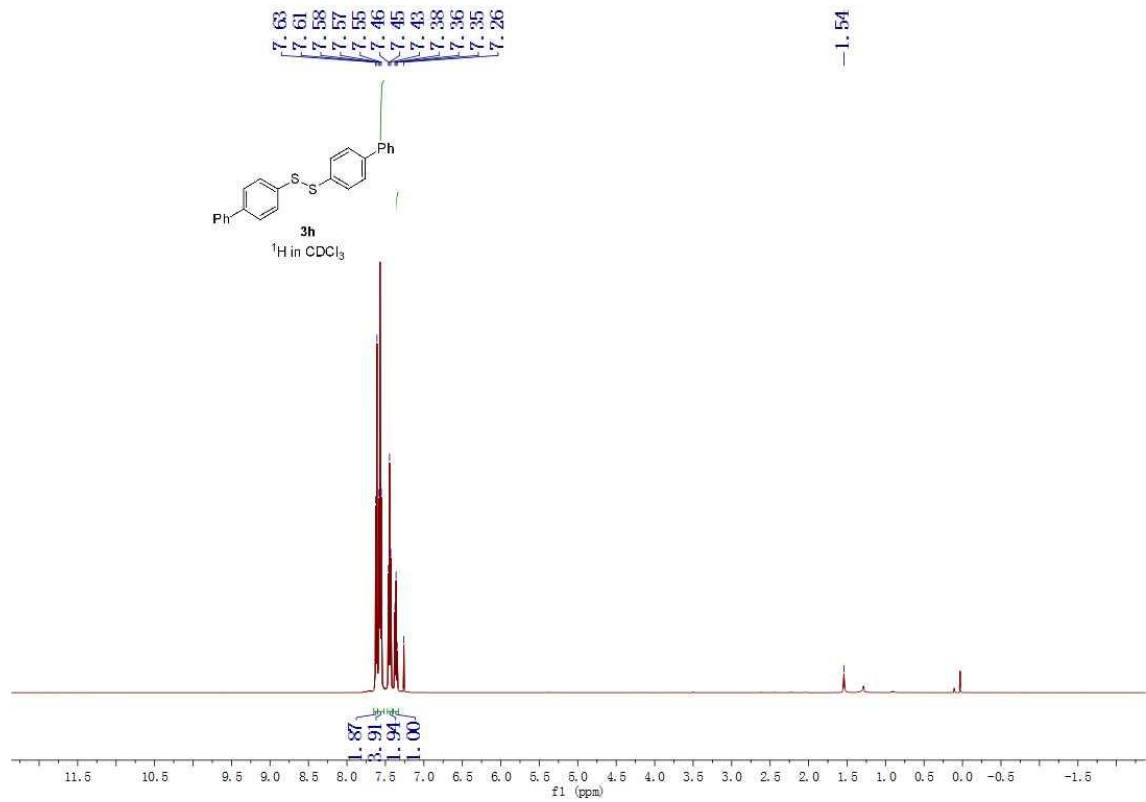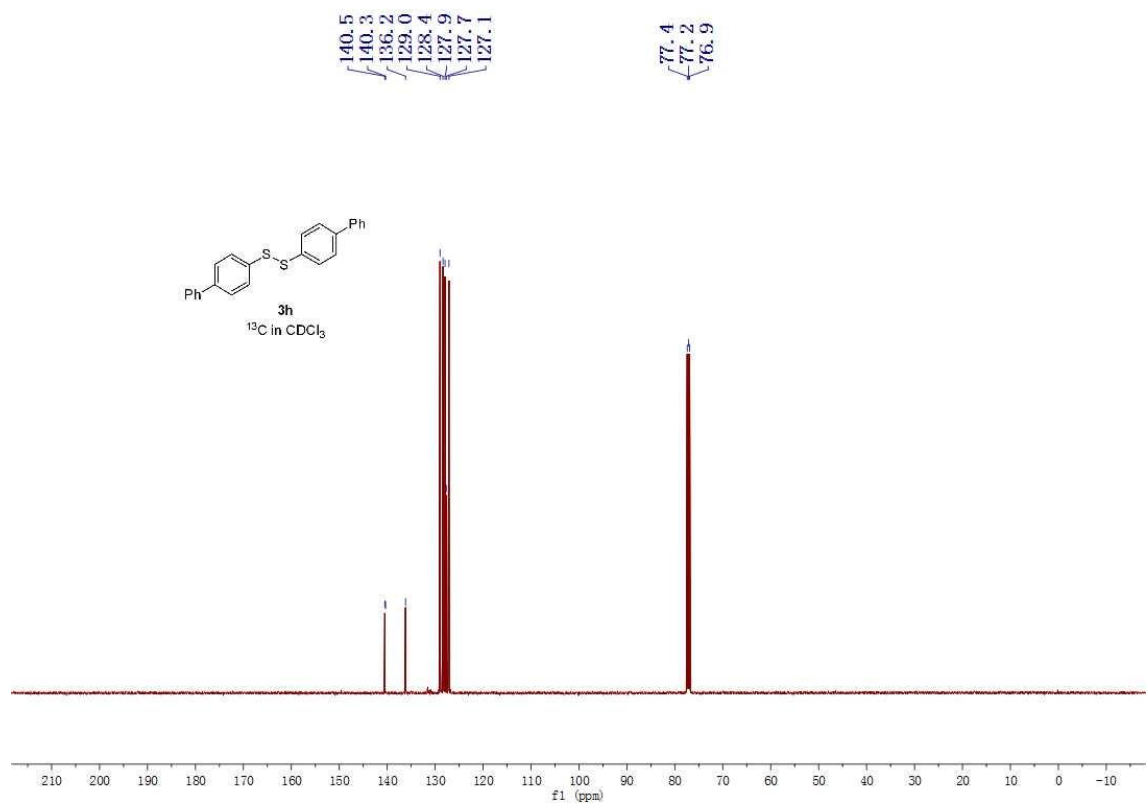



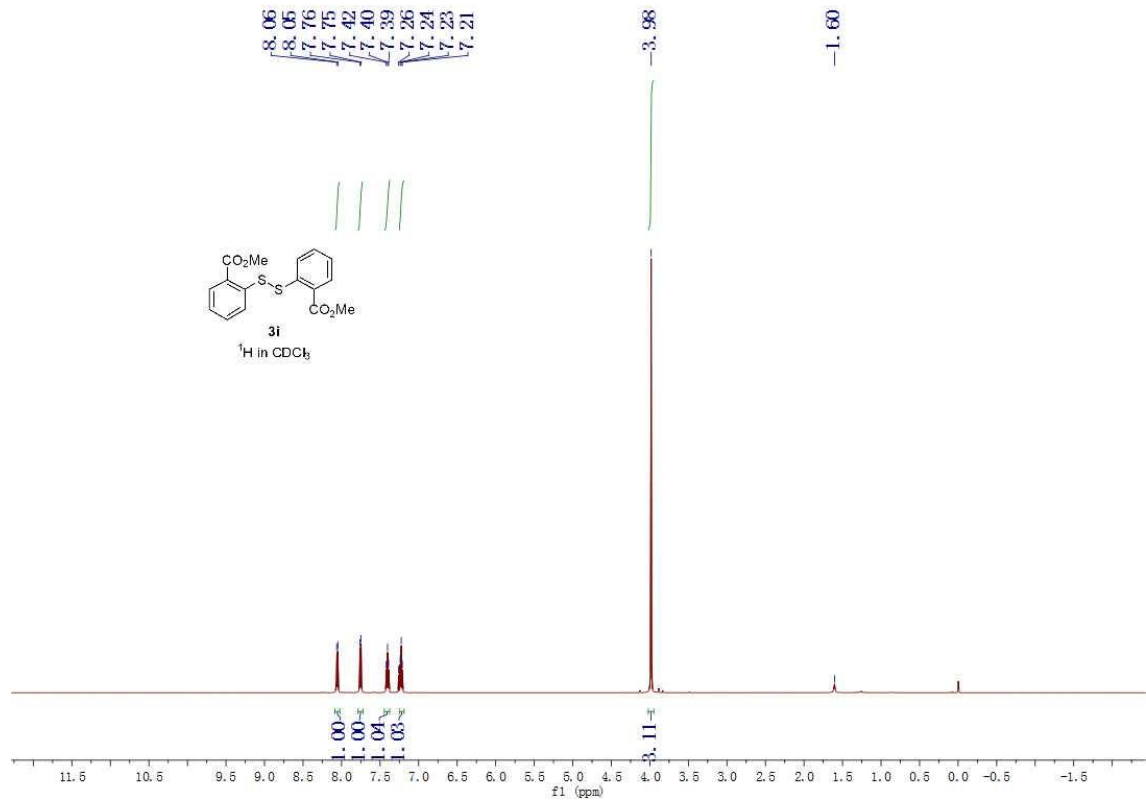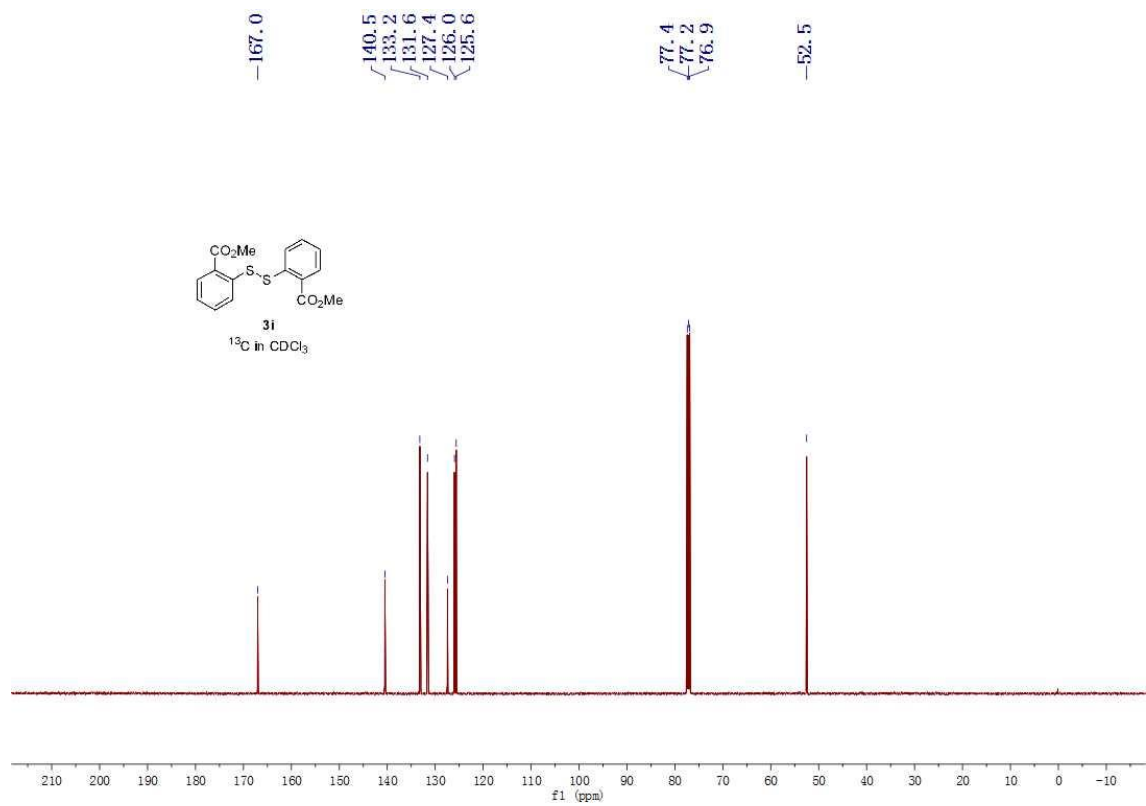

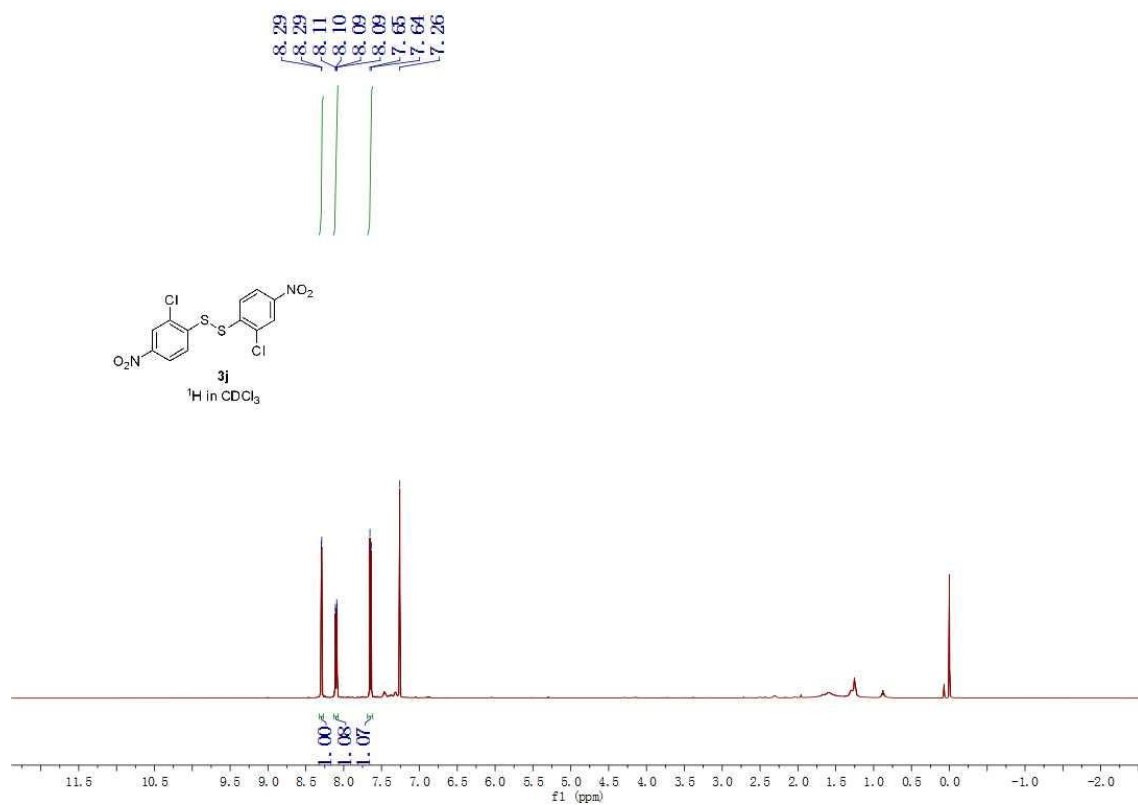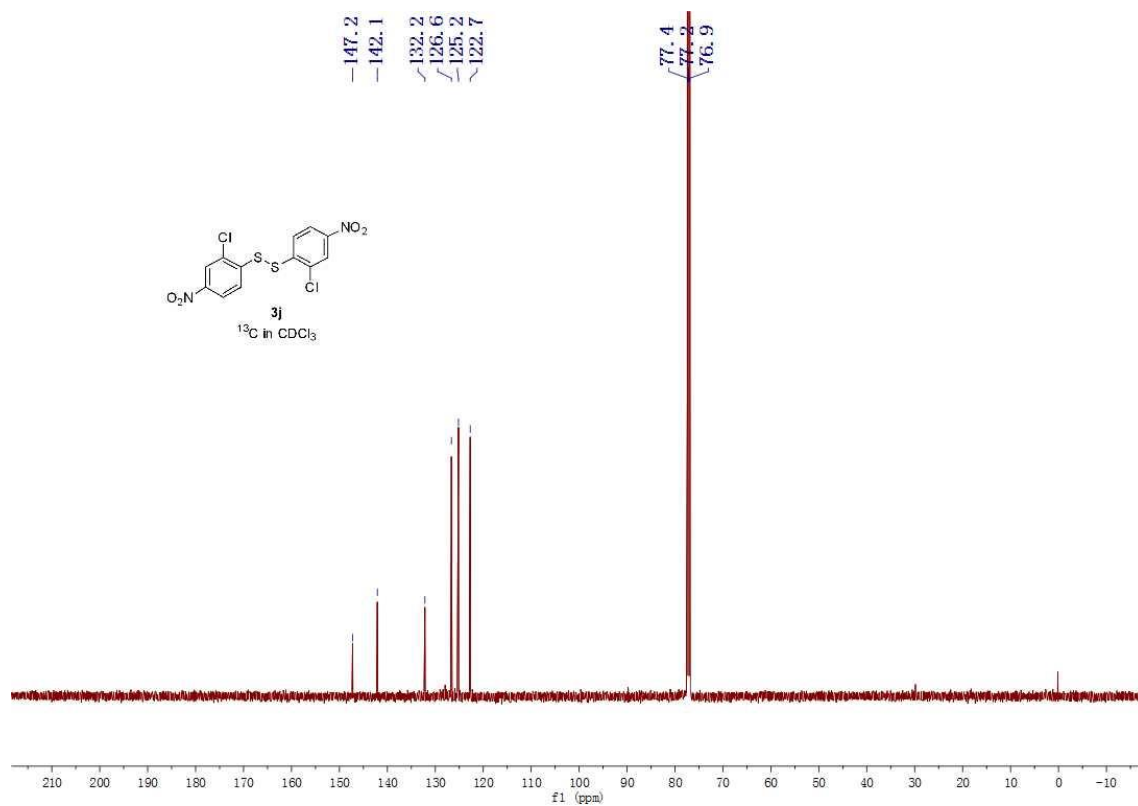

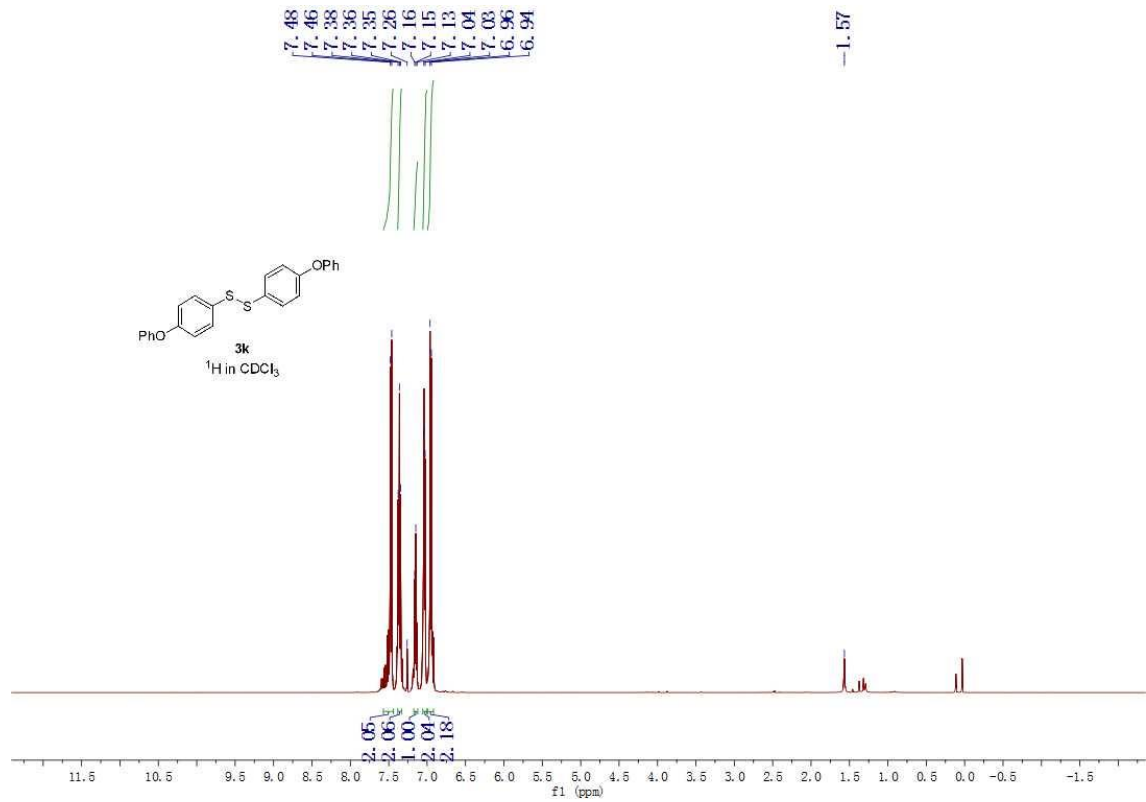

-1.57

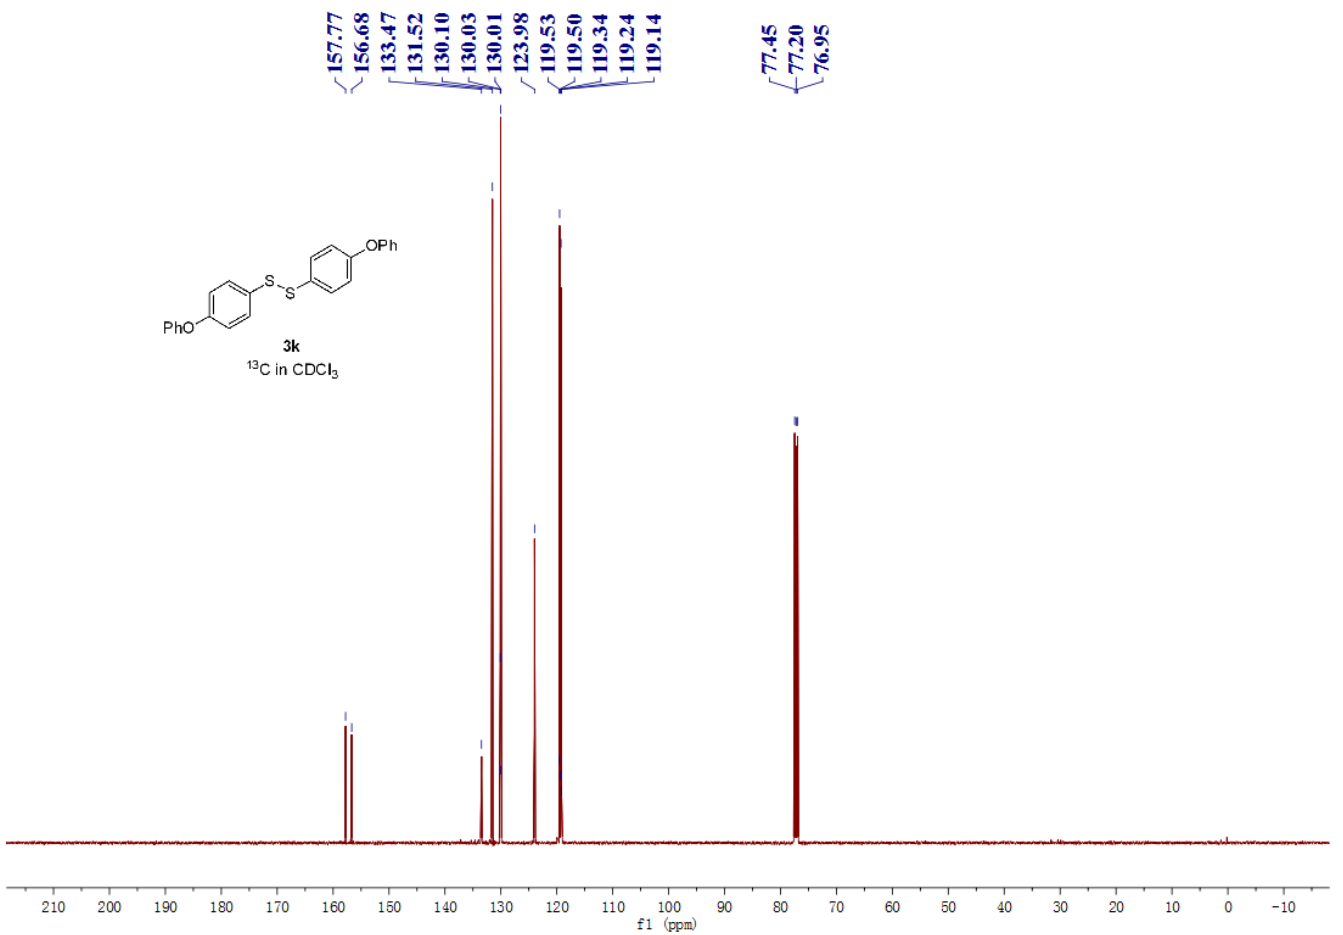

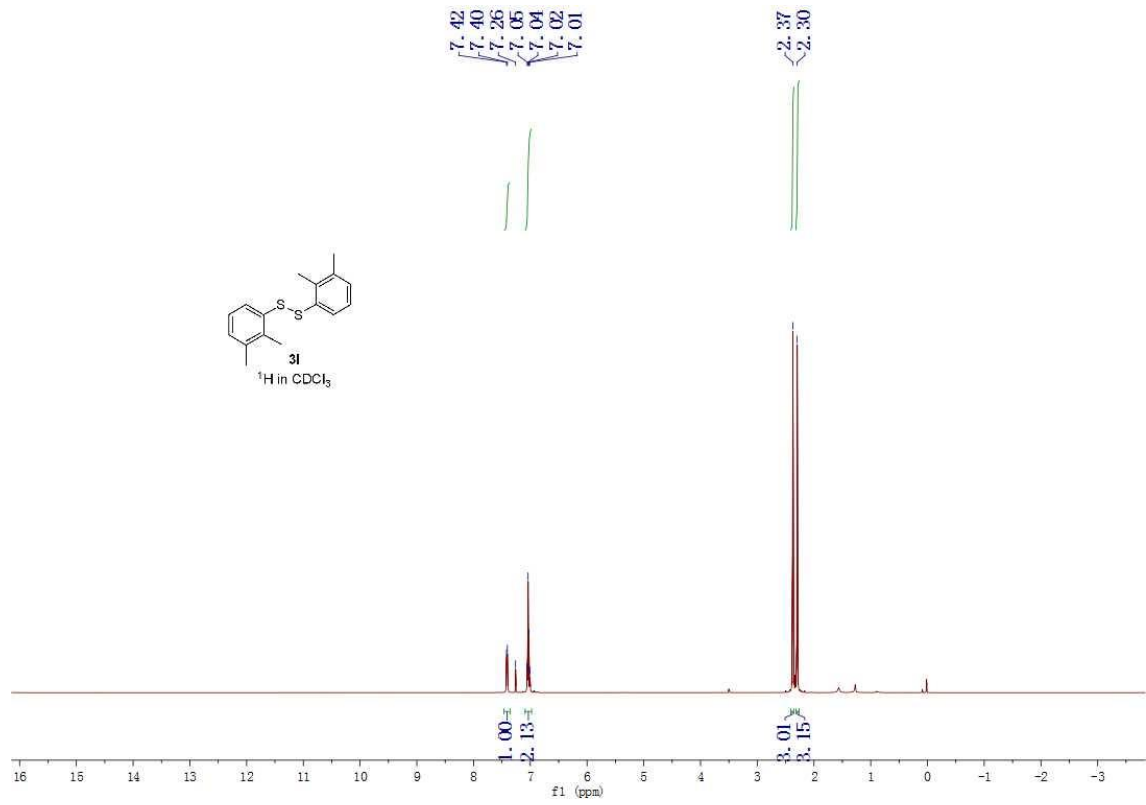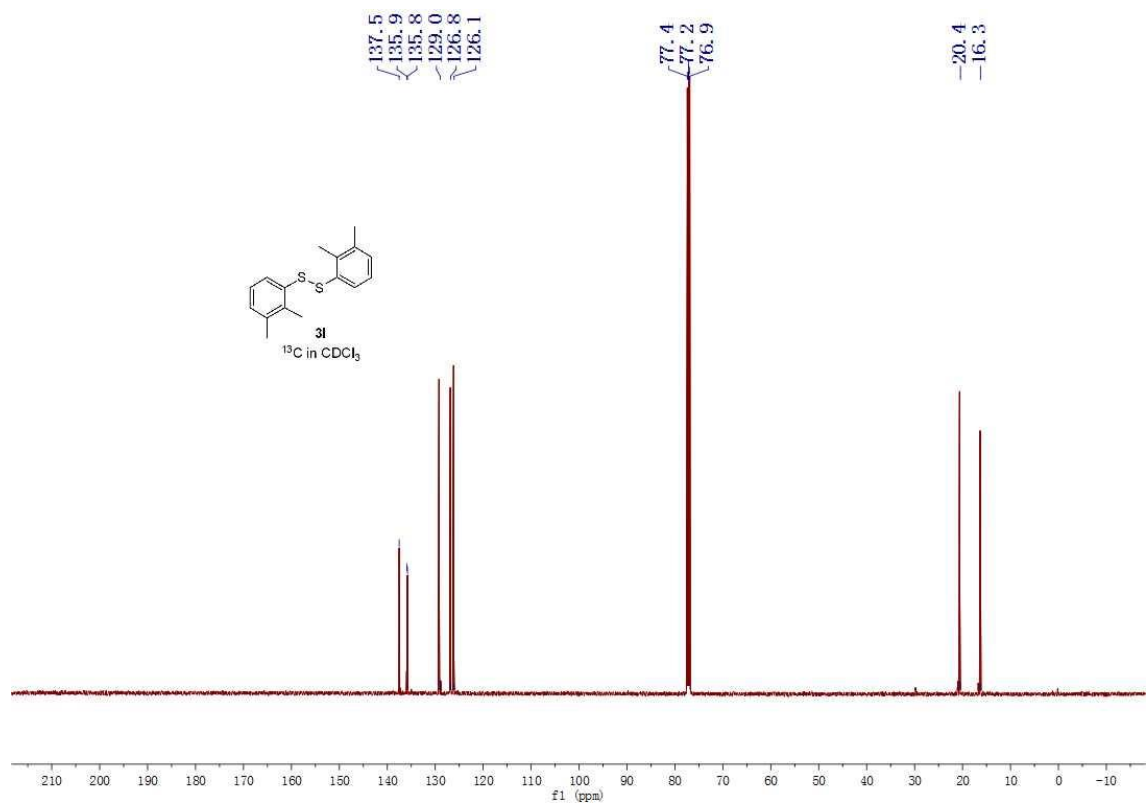

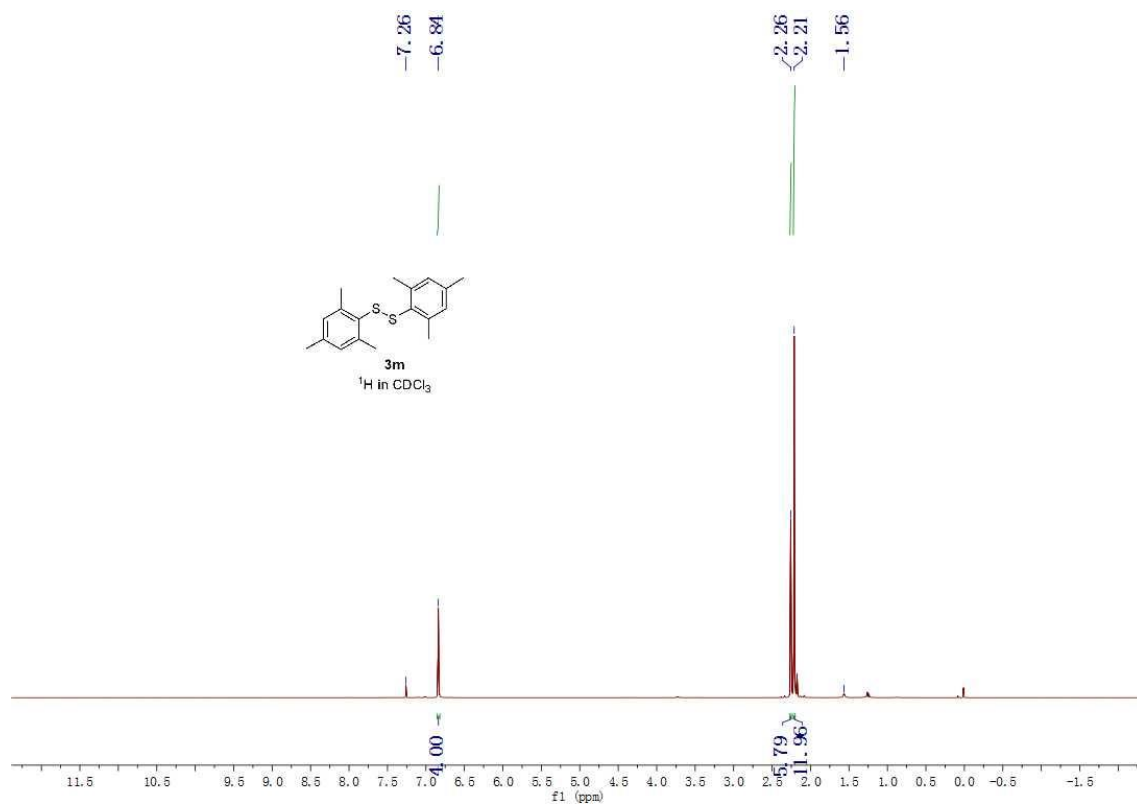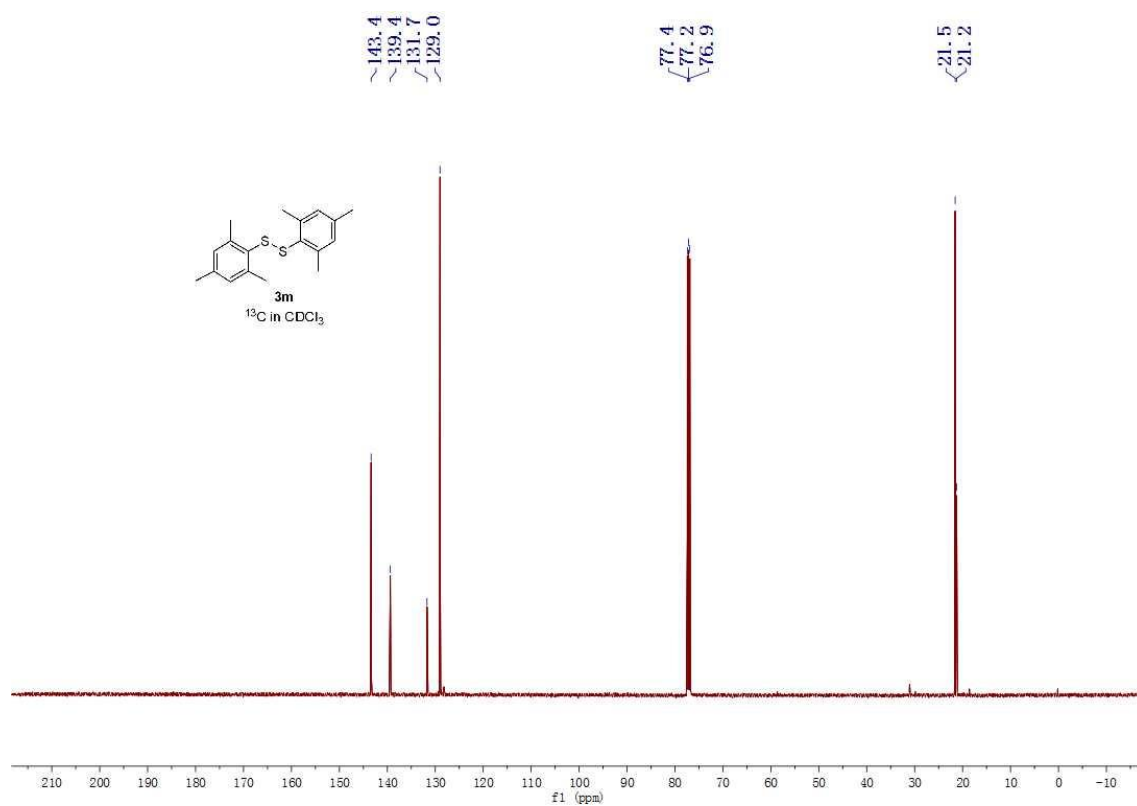

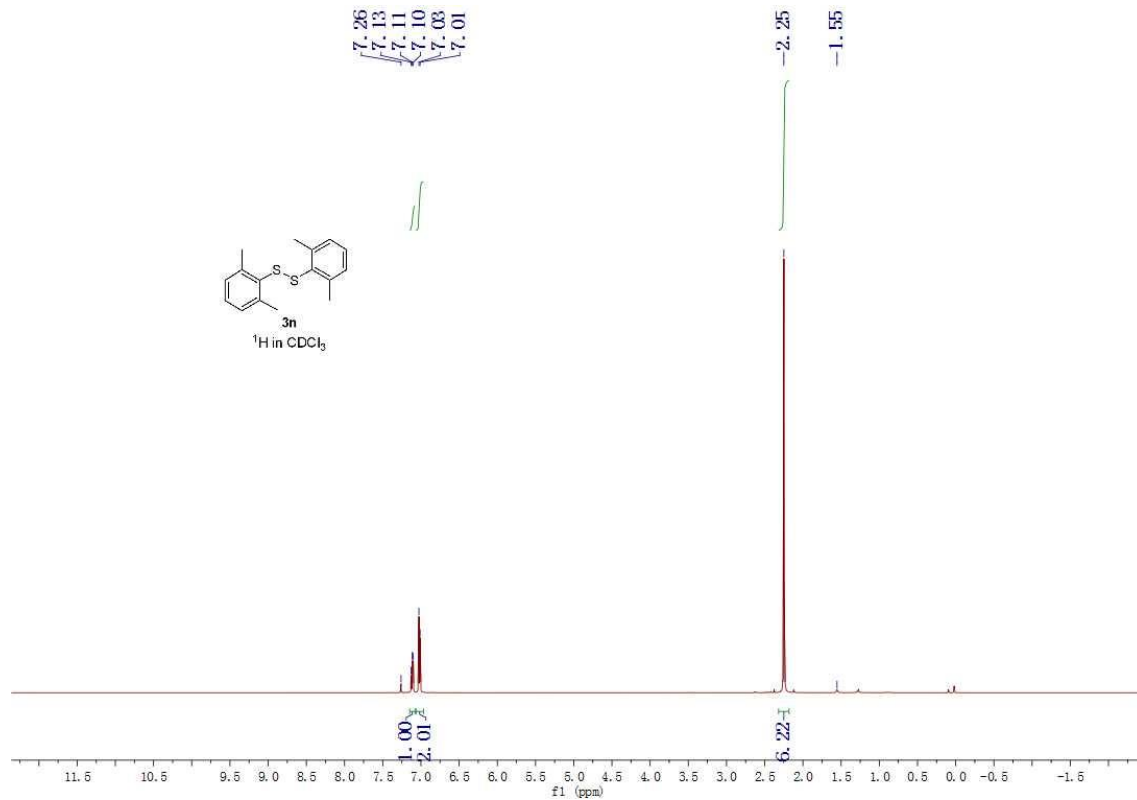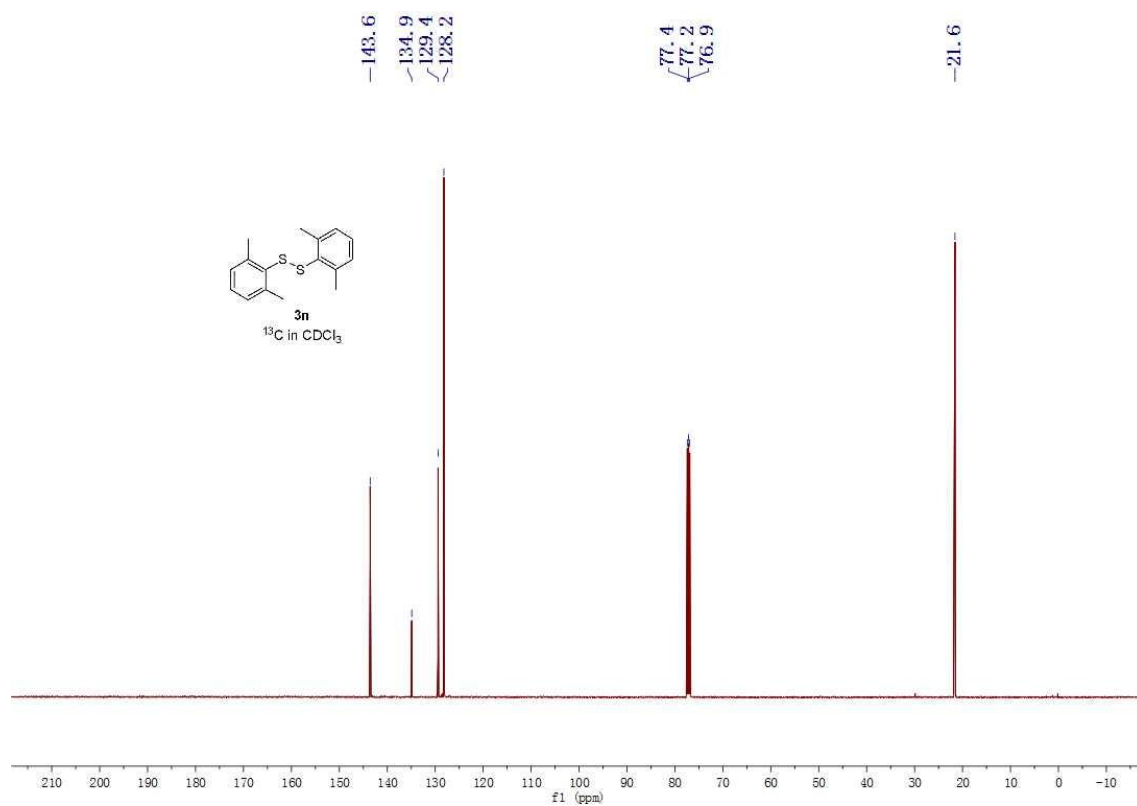

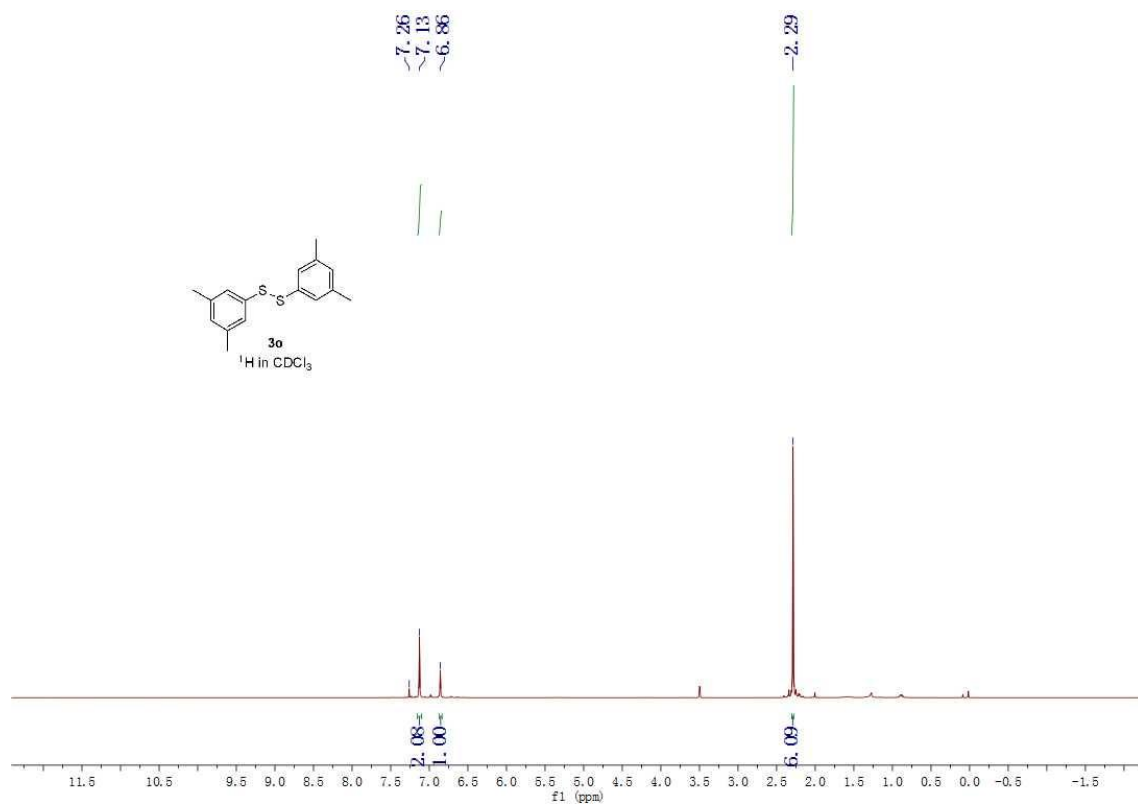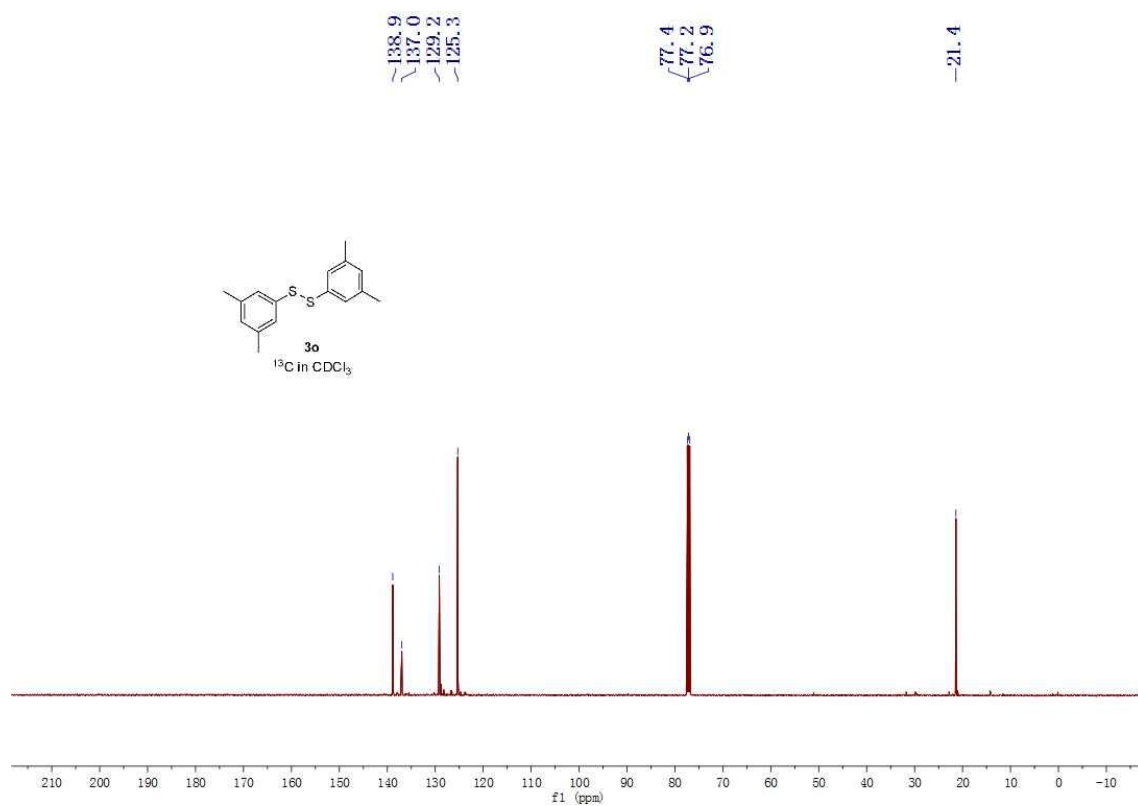

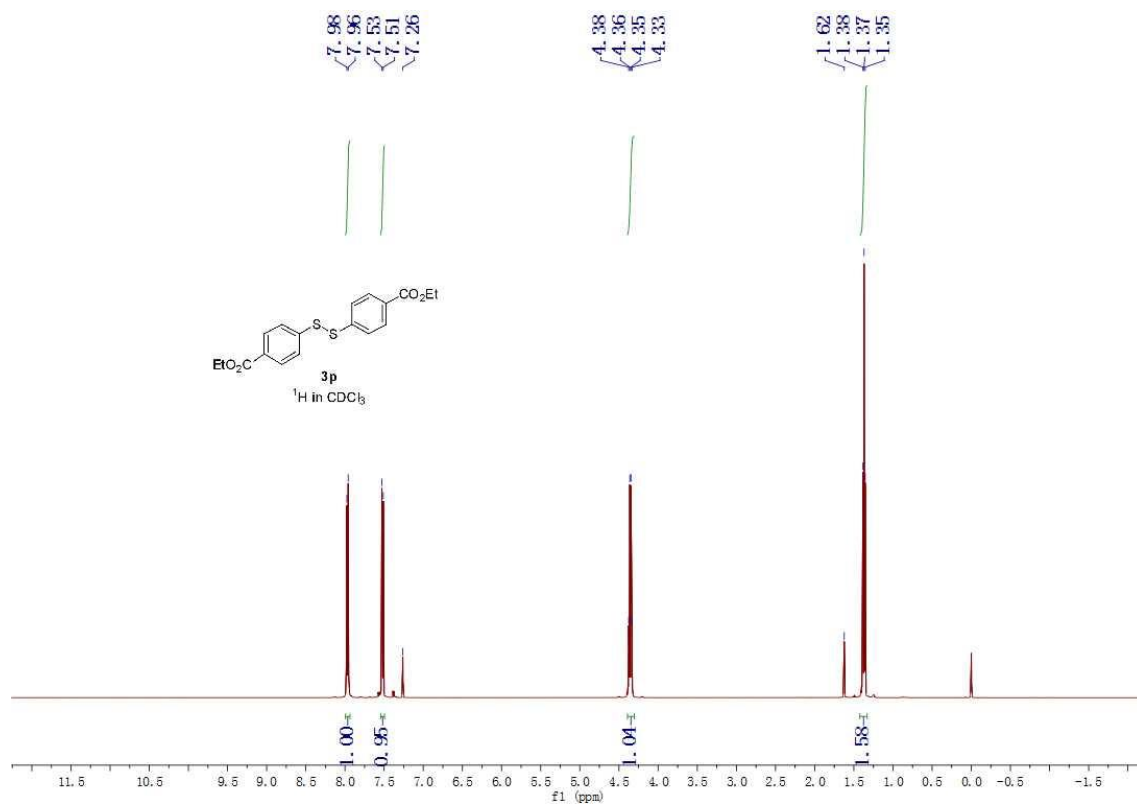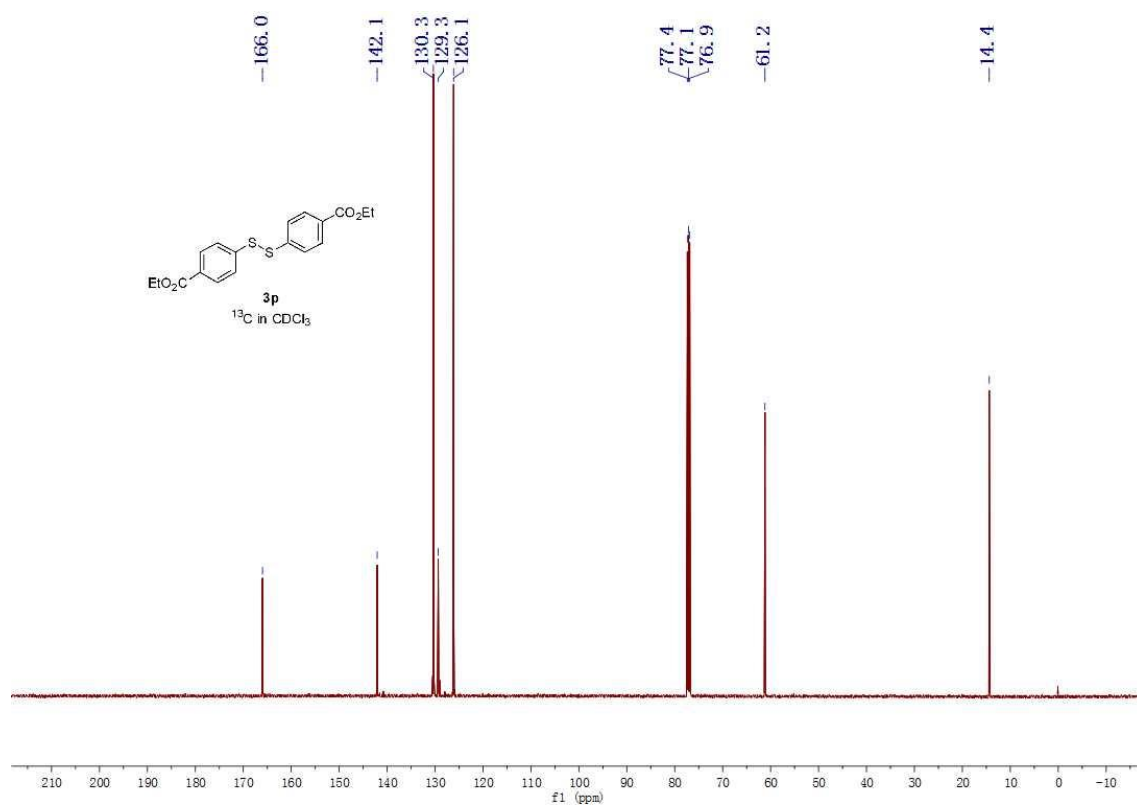

Supplement: Beilstein_J_Org_Chem-13-903-s001.pdf [file Beilstein_J_Org_Chem-13-903-s001.pdf]
